# Supplementary material for: Design, synthesis, and characterization of novel 5-ethylsulfonyl-indazole-3-carboxamides as dual VEGFR-2 and EGFR inhibitors: apoptotic antiproliferative and immunomodulatory evaluations
Source: Royal Society of Chemistry journal article supplement (doi:10.1039/d5ra07017a), 2025-01-01
Supplement: d5ra07017a1.pdf [file d5ra07017a1.pdf]

**Design, synthesis, and characterization of novel 5-ethylsulfonyl-indazole-3-carboxamides as dual VEGFR-2 and EGFR inhibitors: apoptotic antiproliferative, and immunomodulatory evaluations**

Lamya H. Al-Wahaibi<sup>1</sup>, Shima A. Othman<sup>2</sup>, Hesham A. Abou-Zied<sup>3</sup>, Stefan Bräse<sup>4\*</sup>,  
Bahaa G. M. Youssif<sup>2\*</sup>, Safwat M. Rabea<sup>5,6</sup>

<sup>1</sup>Department of Chemistry, College of Sciences, Princess Nourah bint Abdulrahman University, Saudi Arabia; <sup>2</sup>Pharmaceutical Organic Chemistry Department, Faculty of Pharmacy, Assiut University, Assiut 71526, Egypt; <sup>3</sup>Medicinal Chemistry Department, Faculty of Pharmacy, Deraya University, Minia, Egypt; <sup>4</sup>Institute of Biological and Chemical Systems, IBCS-FMS, Karlsruhe Institute of Technology, 76131 Karlsruhe, Germany, <sup>5</sup>Medicinal Chemistry Department, Faculty of Pharmacy, Minia University, Minia 61519, Egypt; <sup>6</sup>Apogee Pharmaceuticals, 4475 Weyburn Dr, Suite 105, Burnaby, BC V6V2H8, Canada.

*\*To whom correspondence should be addressed:*

**Bahaa G. M. Youssif**, Ph.D. Pharmaceutical Organic Chemistry Department, Faculty of Pharmacy, Assiut University, Assiut 71526, Egypt.

Tel.: (002)-01098294419

*E-mail* address: [bgyoussif@ju.edu.sa](mailto:bgyoussif@ju.edu.sa)

**Stefan Bräse**

Institute of Biological and Chemical Systems, IBCS-FMS, Karlsruhe Institute of Technology, 76131 Karlsruhe, Germany. *E-mail*: [braese@kit.edu](mailto:braese@kit.edu)

## Supplementary Data

**Figure S1:**  $^1\text{H}$  NMR spectrum (400 MHz,  $\text{DMSO}-d_6$ ) of compound **2**

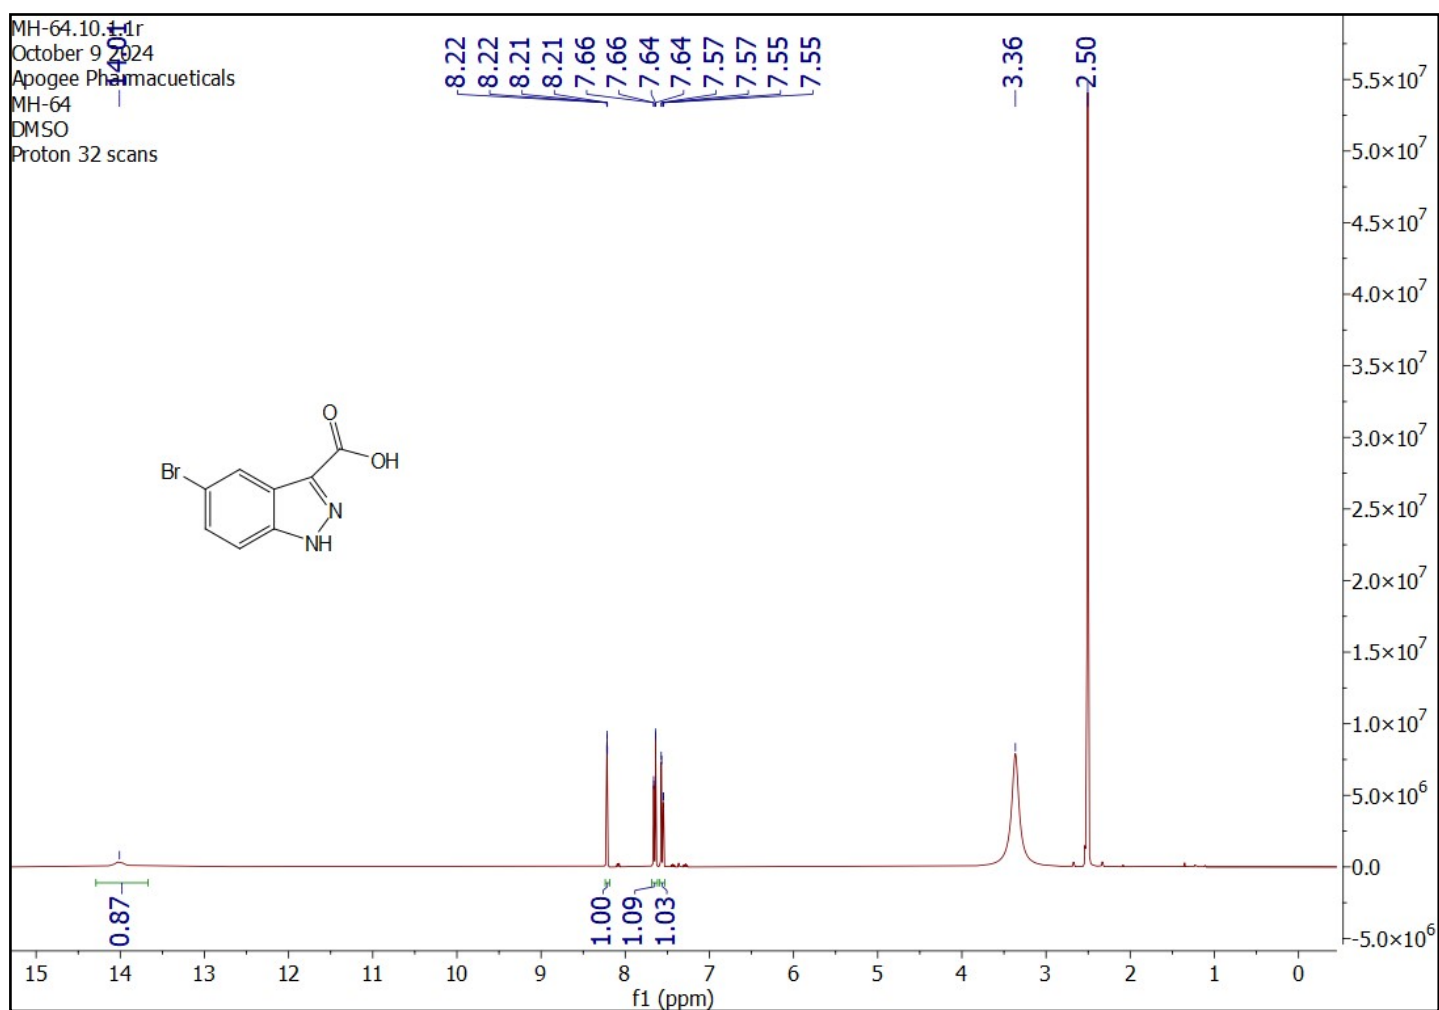

**Figure S2:** HRMS spectrum of compound **2** showing [M-H] peak

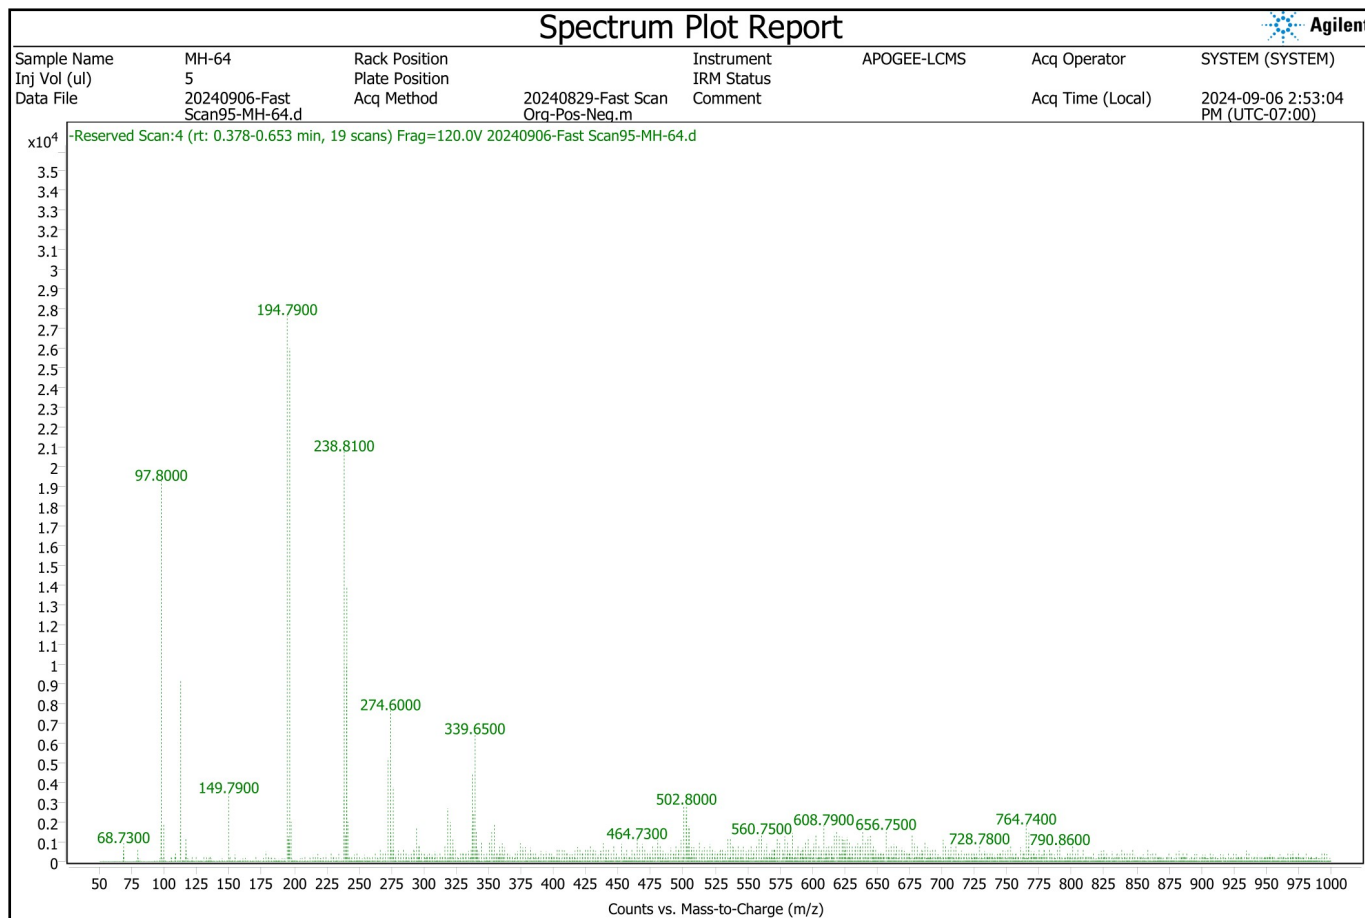

**Figure S3:**  $^1\text{H}$  NMR spectrum (400 MHz,  $\text{DMSO-}d_6$ ) of compound **3**

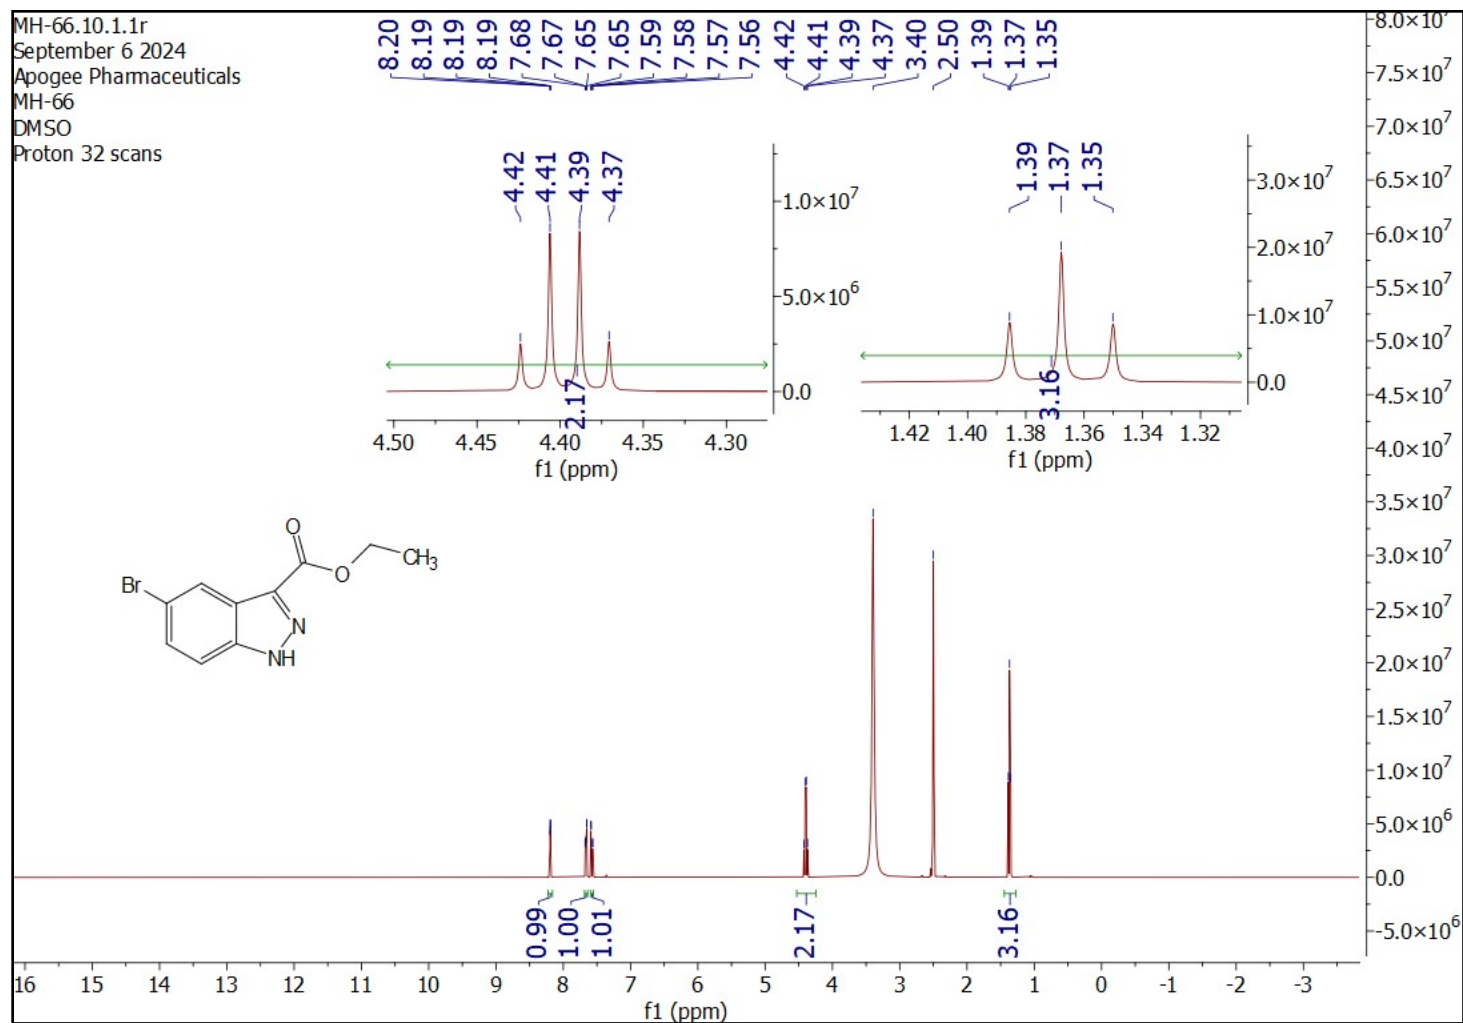

**Figure S4:** HRMS spectrum of compound **3** showing [M-H] peak

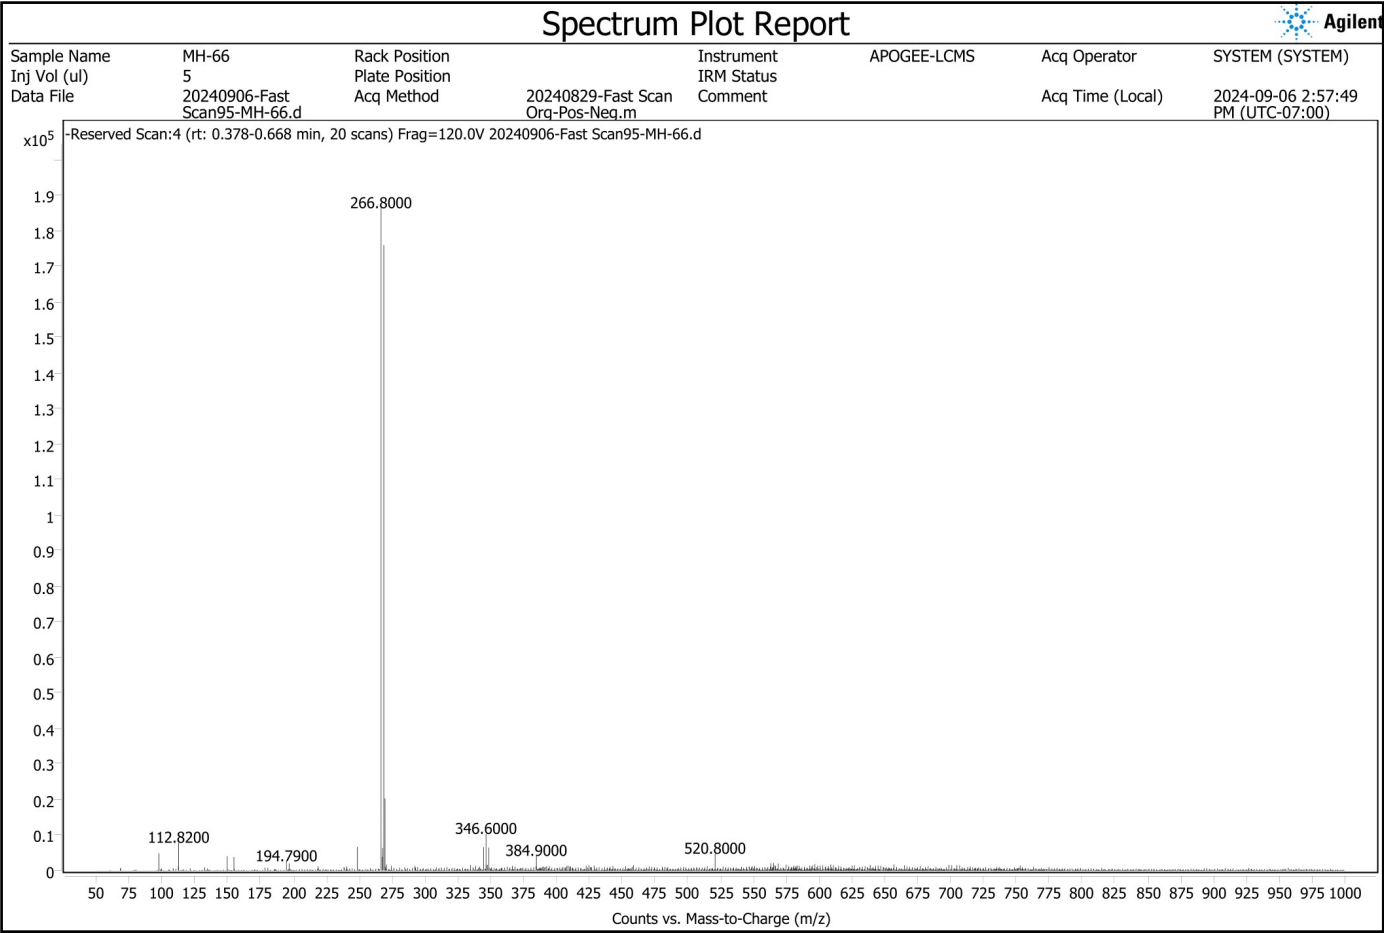

**Figure S5:**  $^1\text{H}$  NMR spectrum (400 MHz,  $\text{DMSO}-d_6$ ) of compound **4**

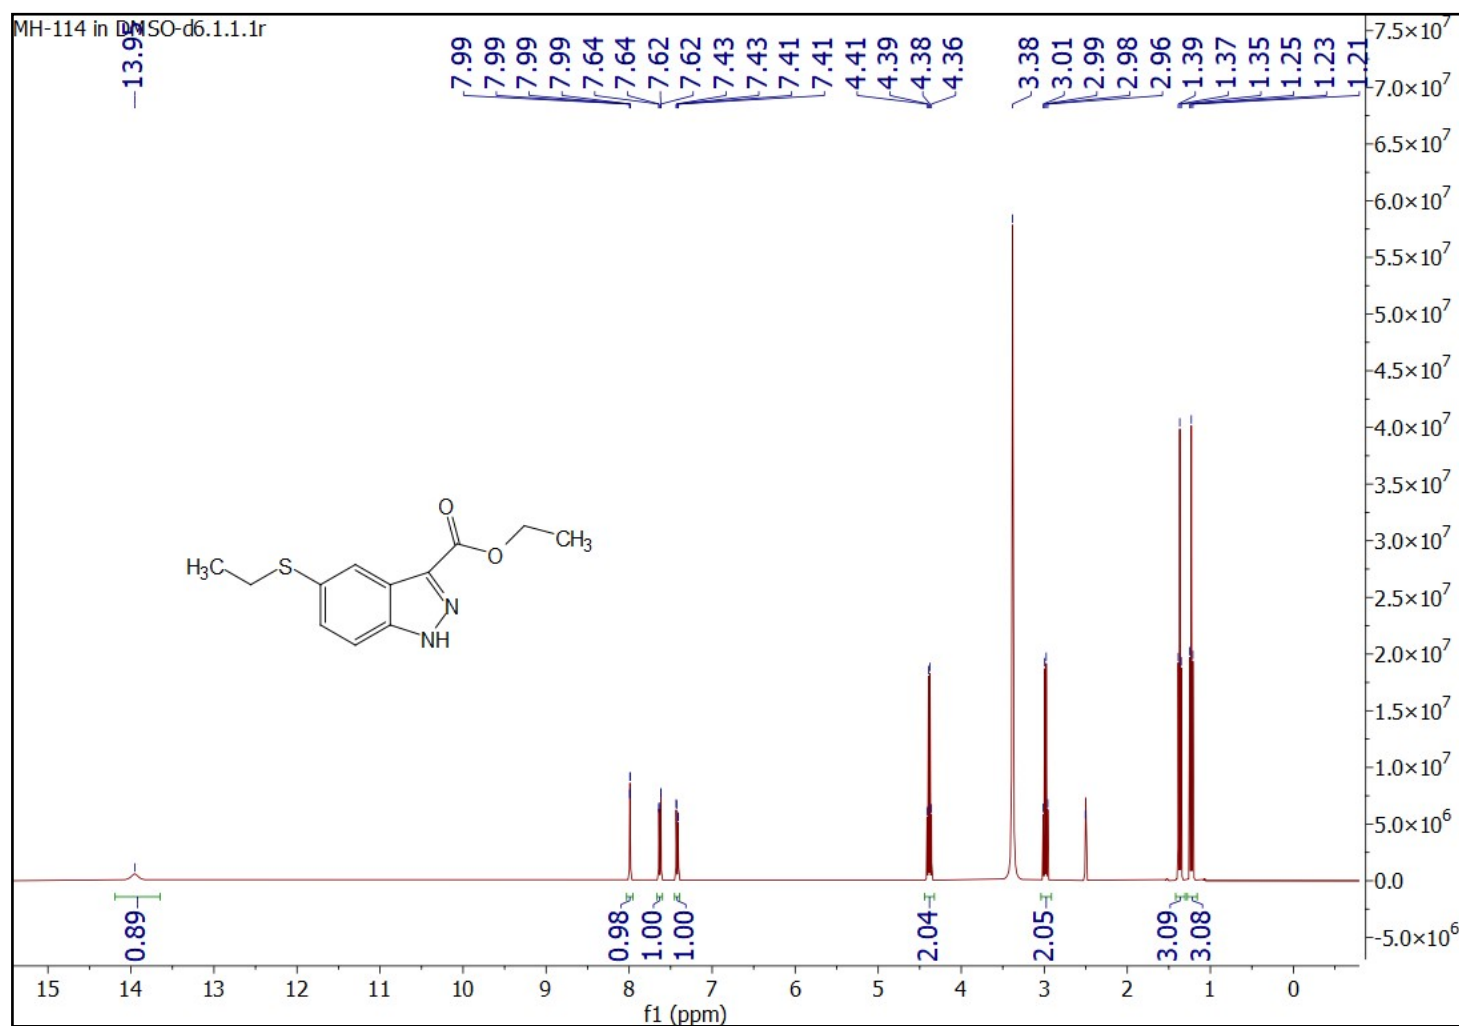

Figure S6: HRMS spectrum of compound 4 showing [M-H] peak

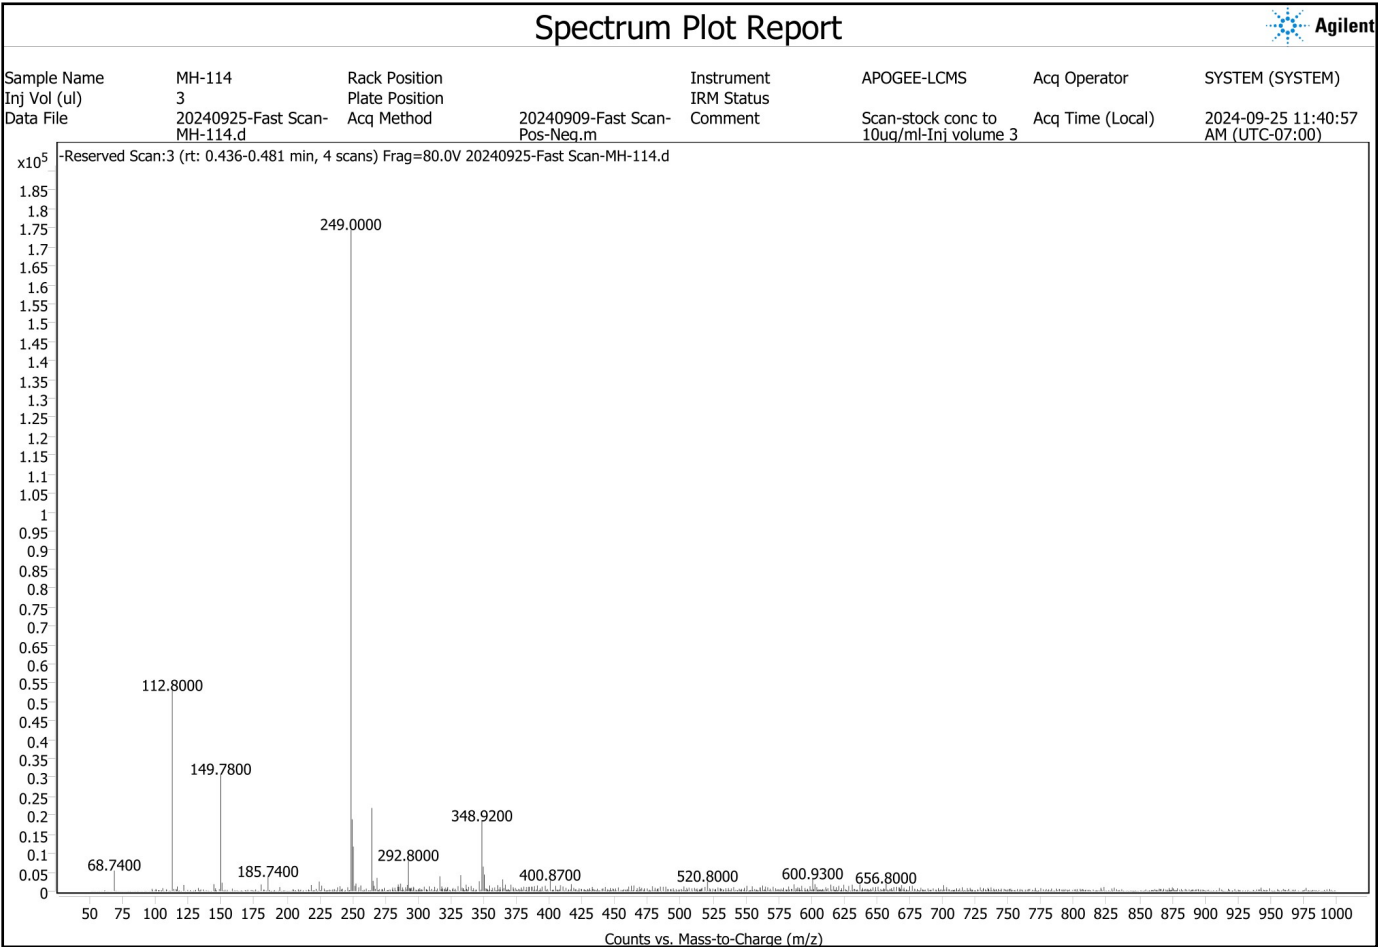

**Figure S7:**  $^1\text{H}$  NMR spectrum (400 MHz,  $\text{DMSO}-d_6$ ) of compound **5**

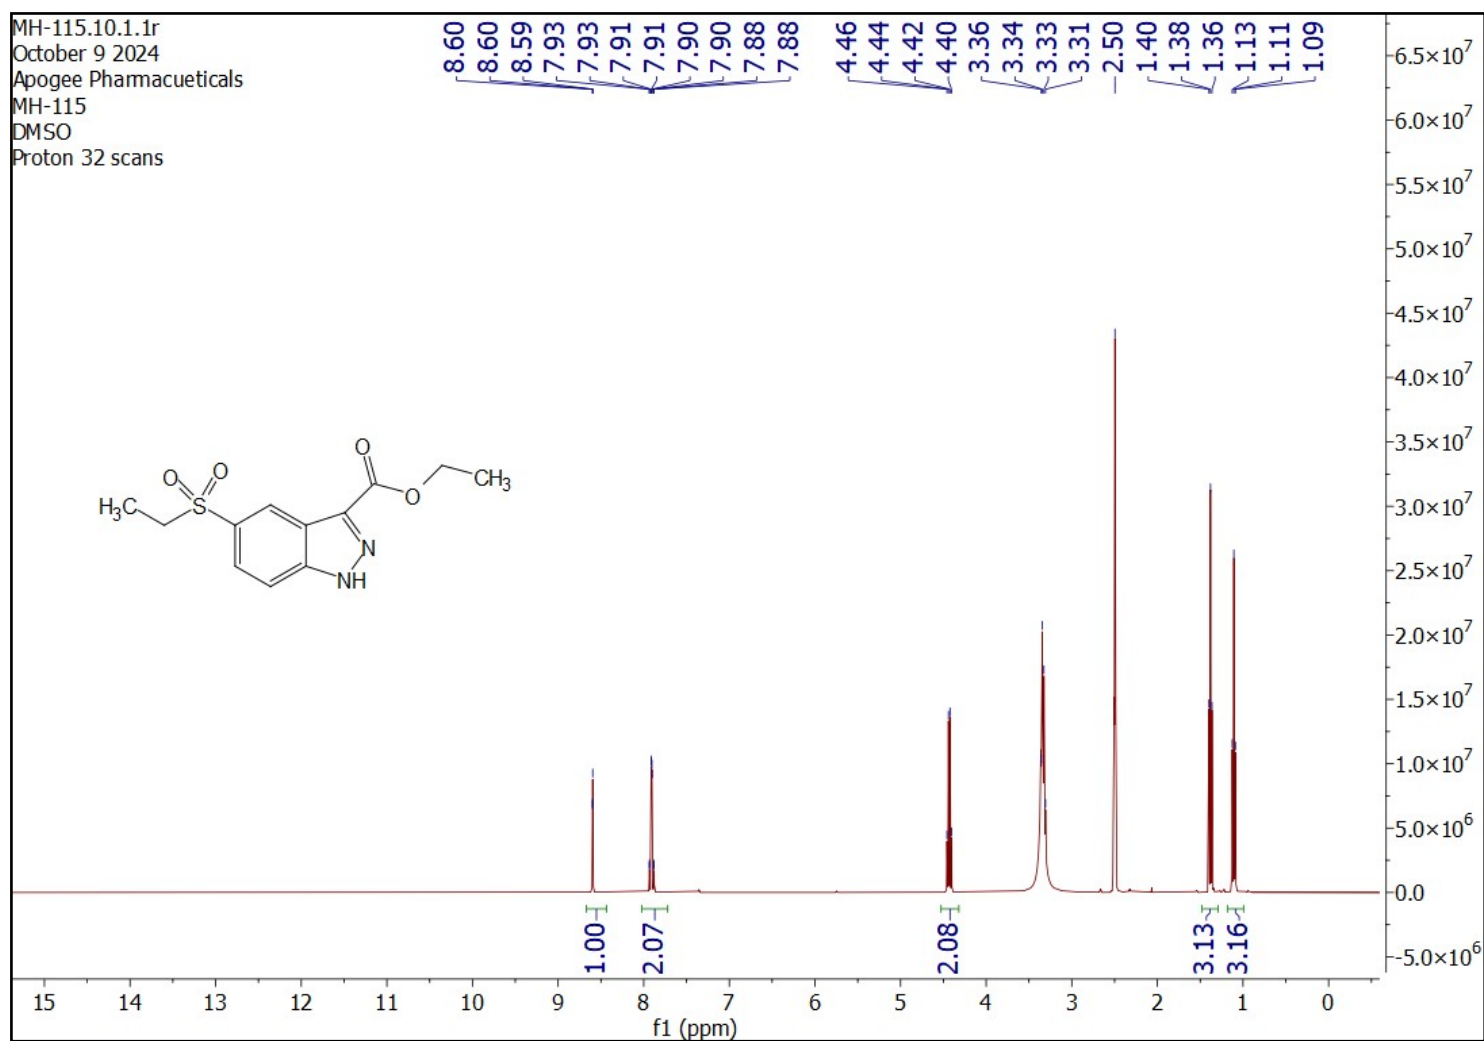

**Figure S8:** HRMS spectrum of compound **5** showing [M-H] peak

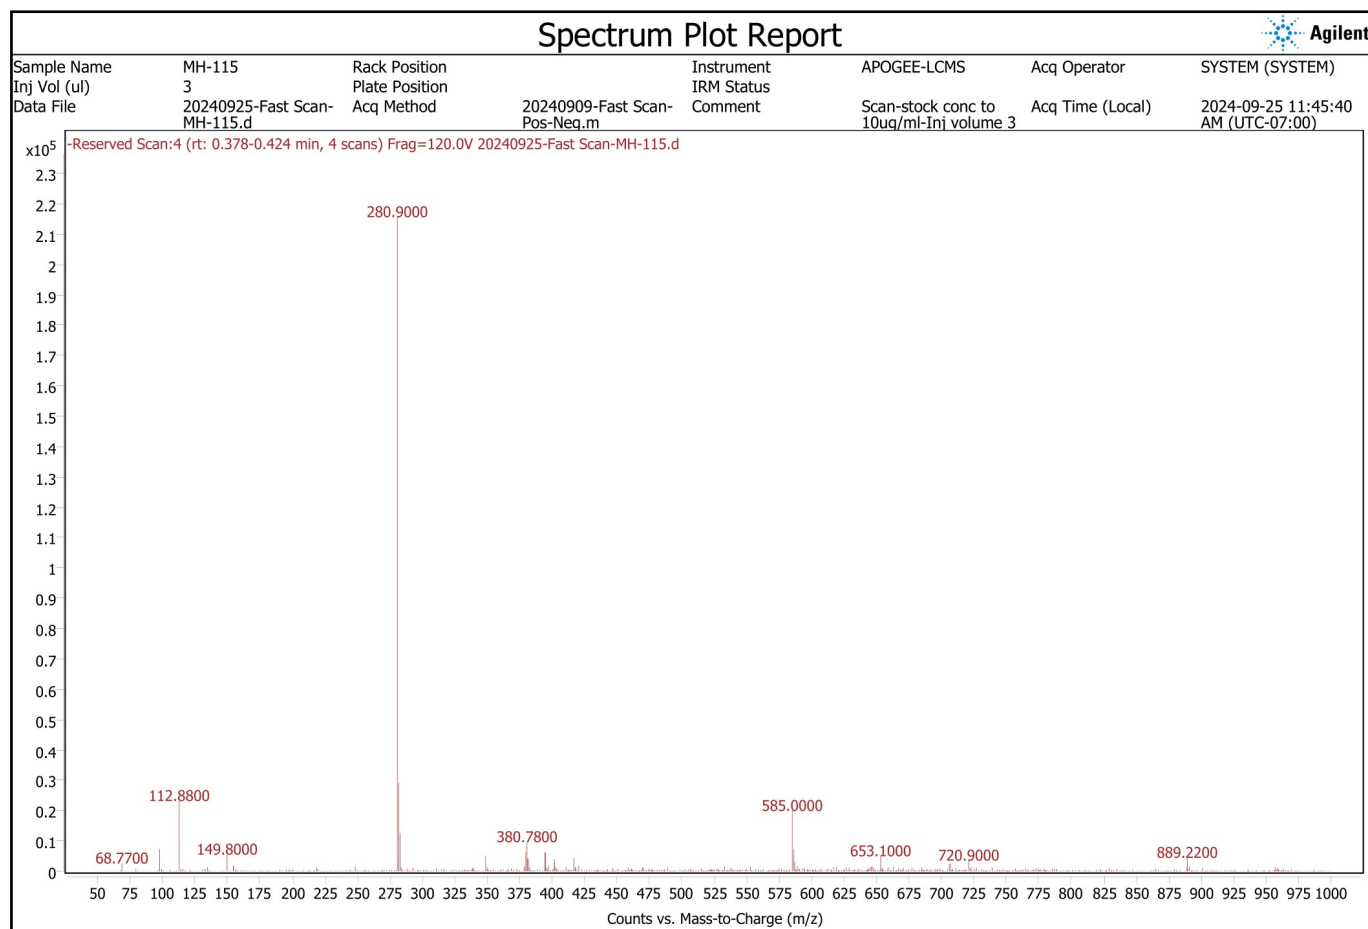

**Figure S9:**  $^1\text{H}$  NMR spectrum (400 MHz,  $\text{DMSO}-d_6$ ) of compound **6**

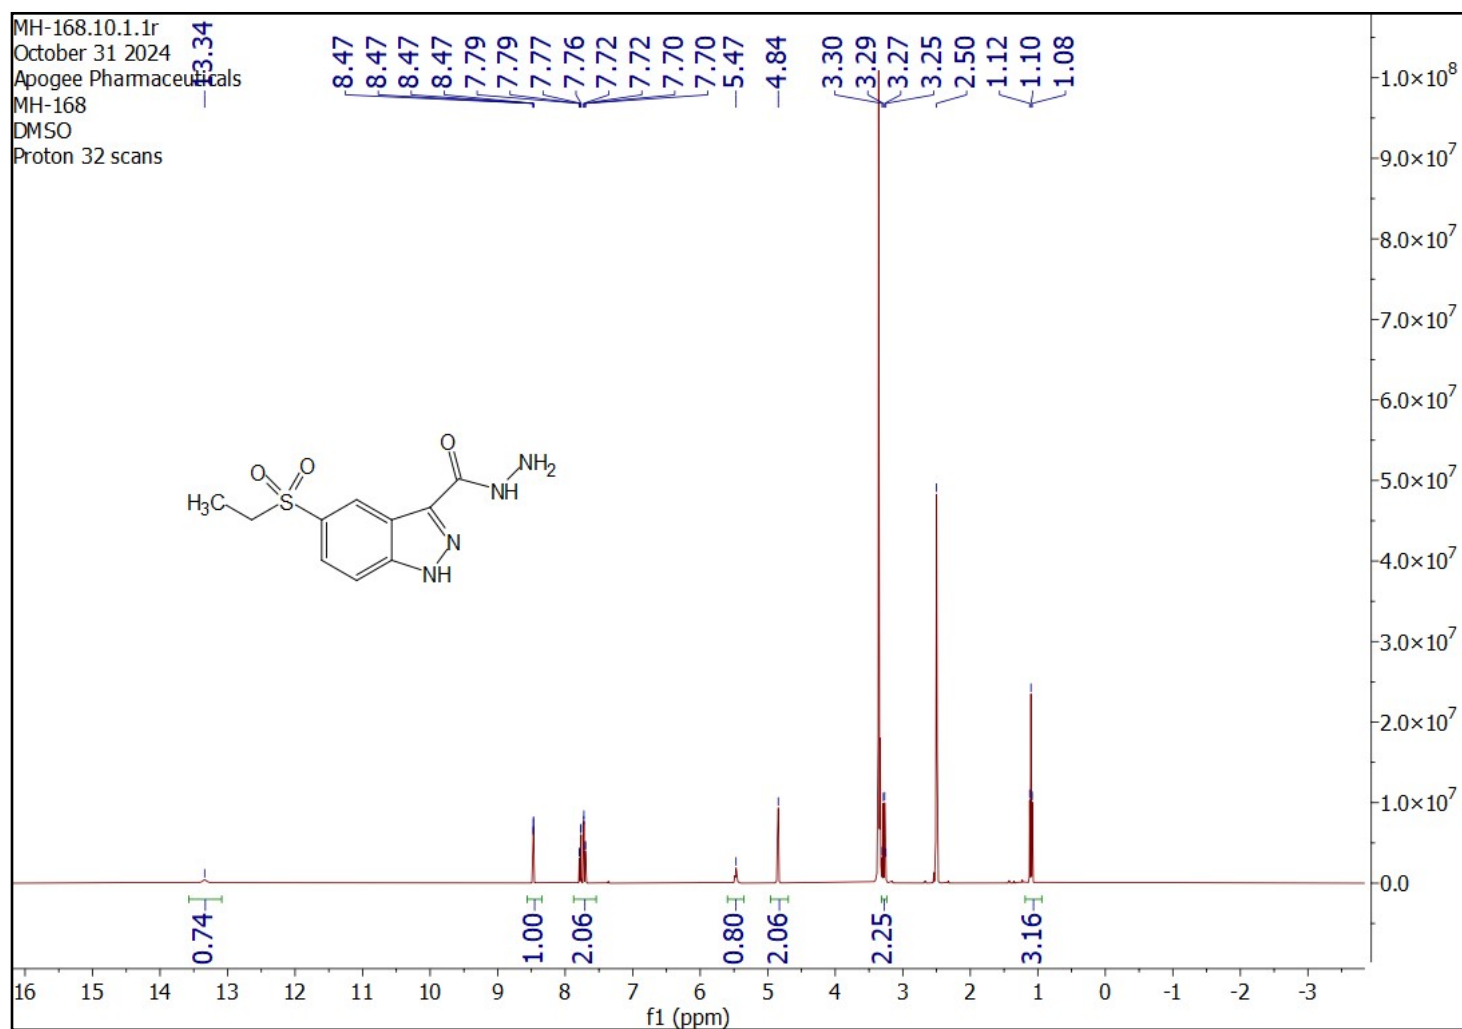

Figure S10: HRMS spectrum of compound 6 showing [M-H] peak

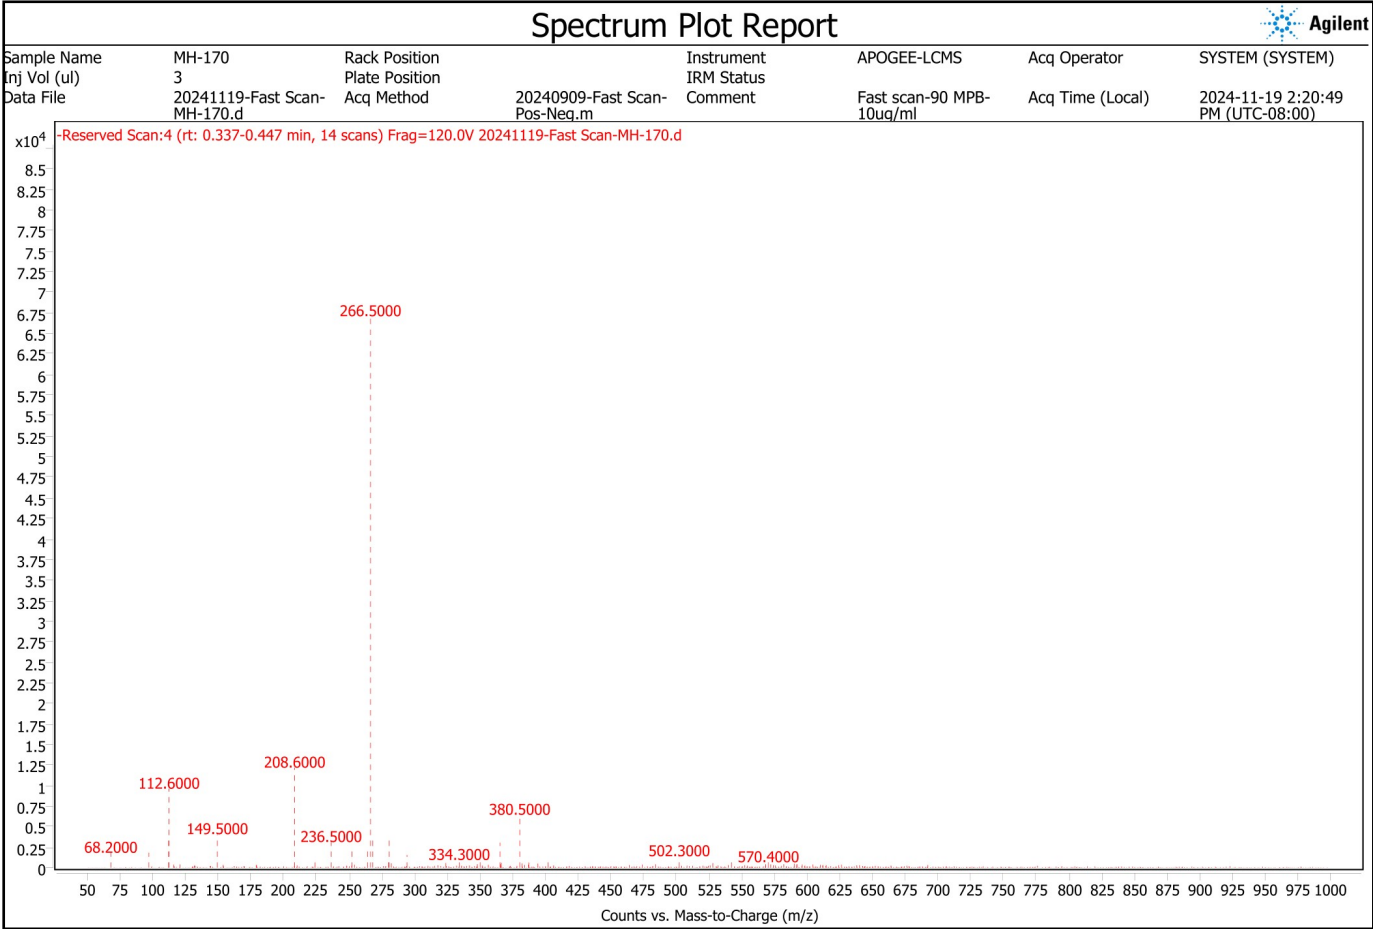

**Figure S11:**  $^1\text{H}$  NMR spectrum (400 MHz,  $\text{DMSO}-d_6$ ) of compound **8a**

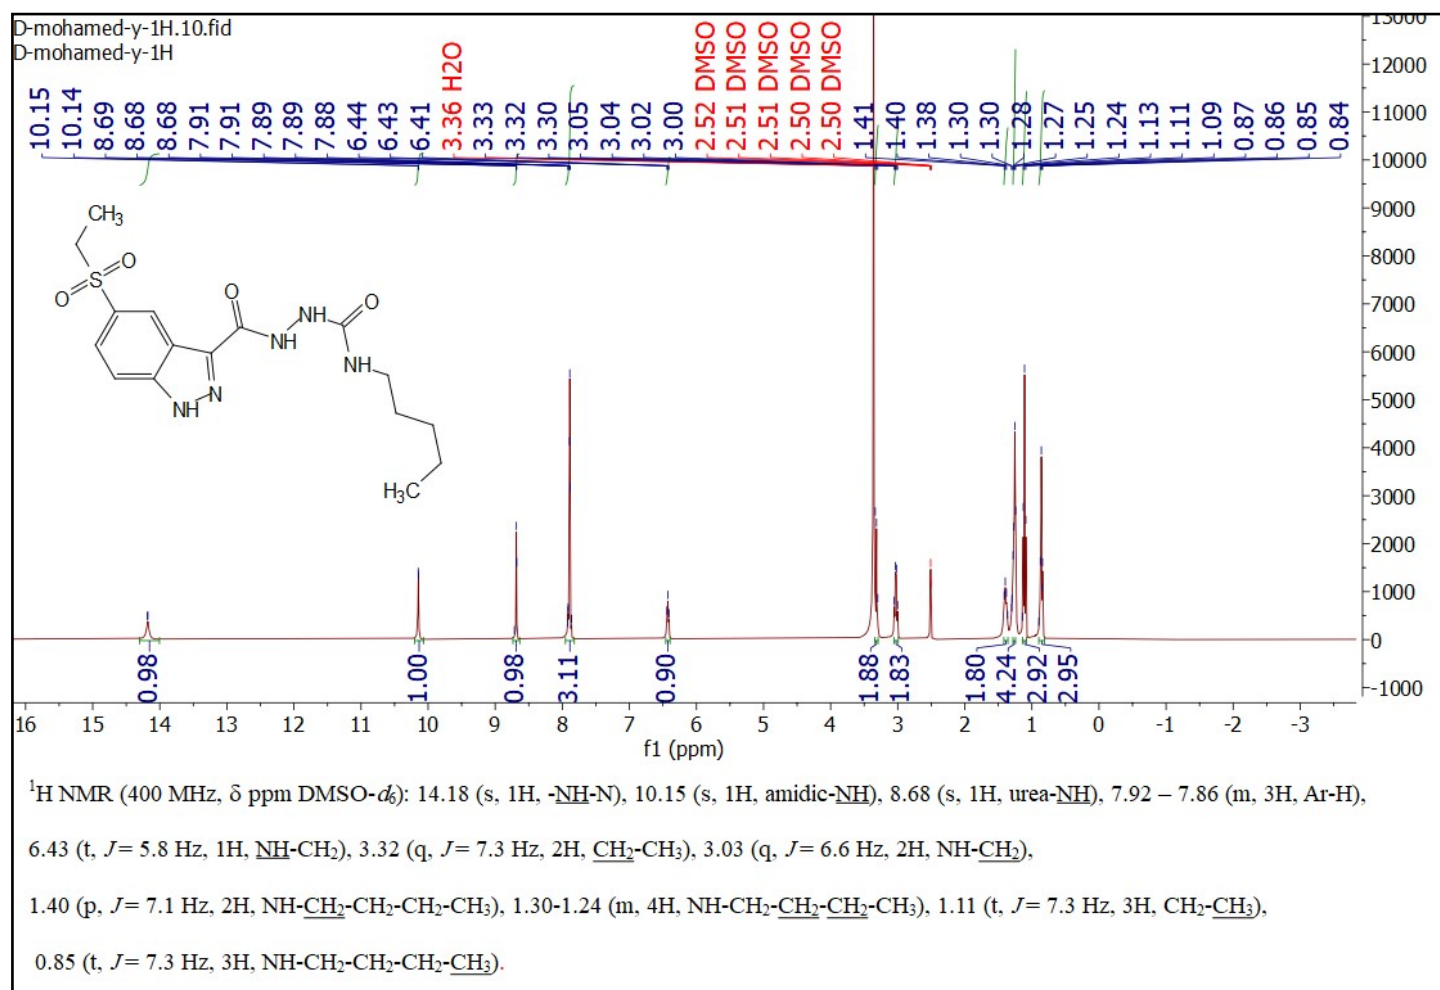

**Figure S12:**  $^{13}\text{C}$  NMR spectrum (101 MHz,  $\text{DMSO-}d_6$ ) of compound **8a**

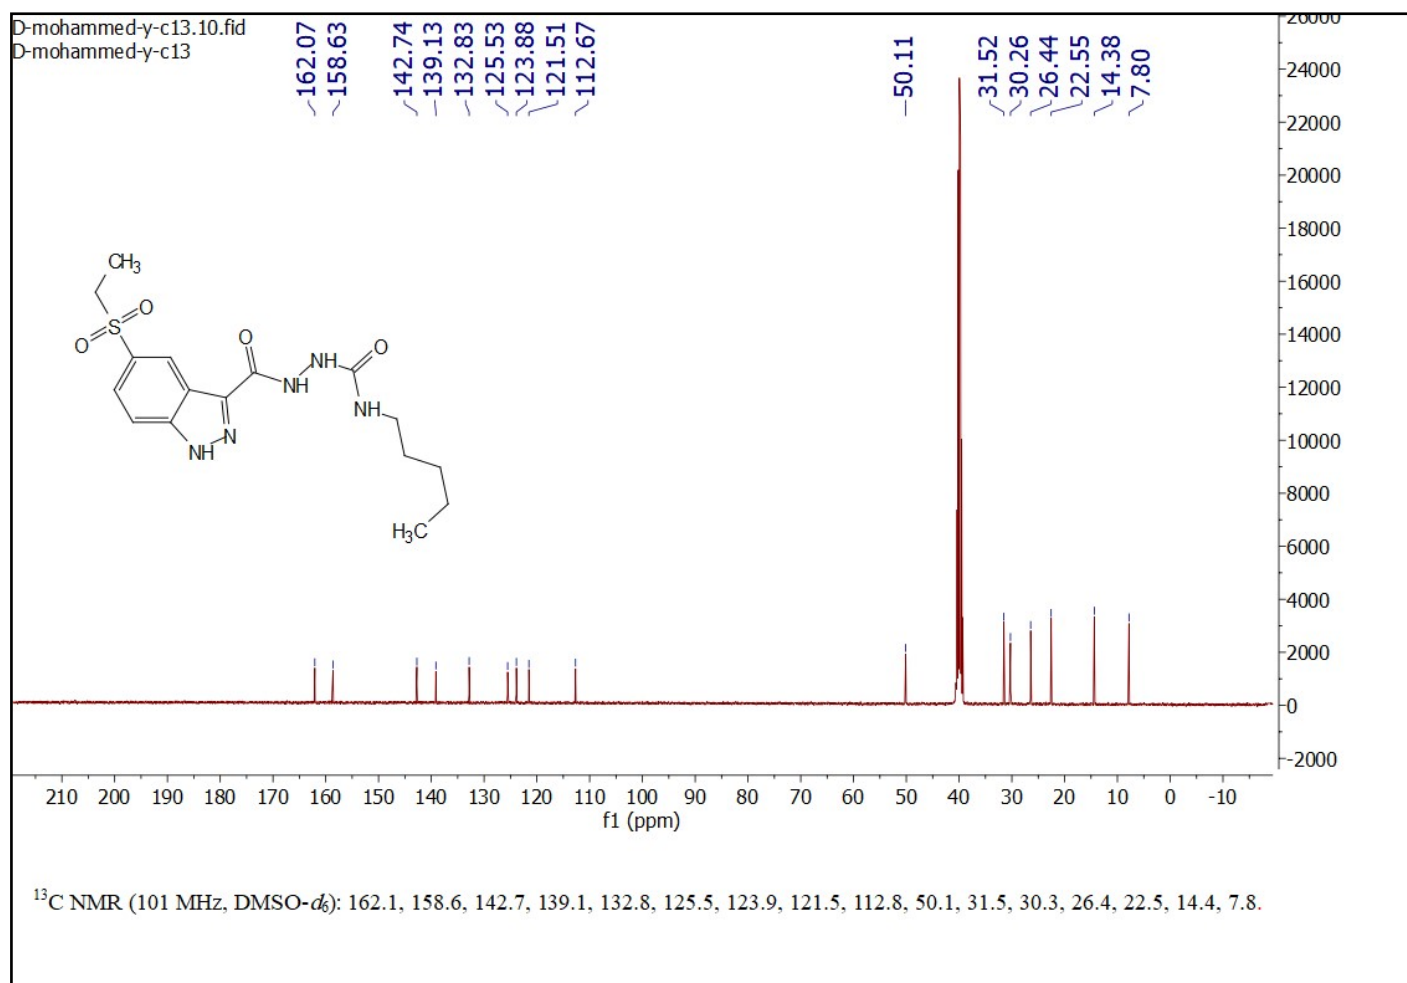

**Figure S13:**  $^1\text{H}$  NMR spectrum (400 MHz,  $\text{DMSO}-d_6$ ) of compound **8b**

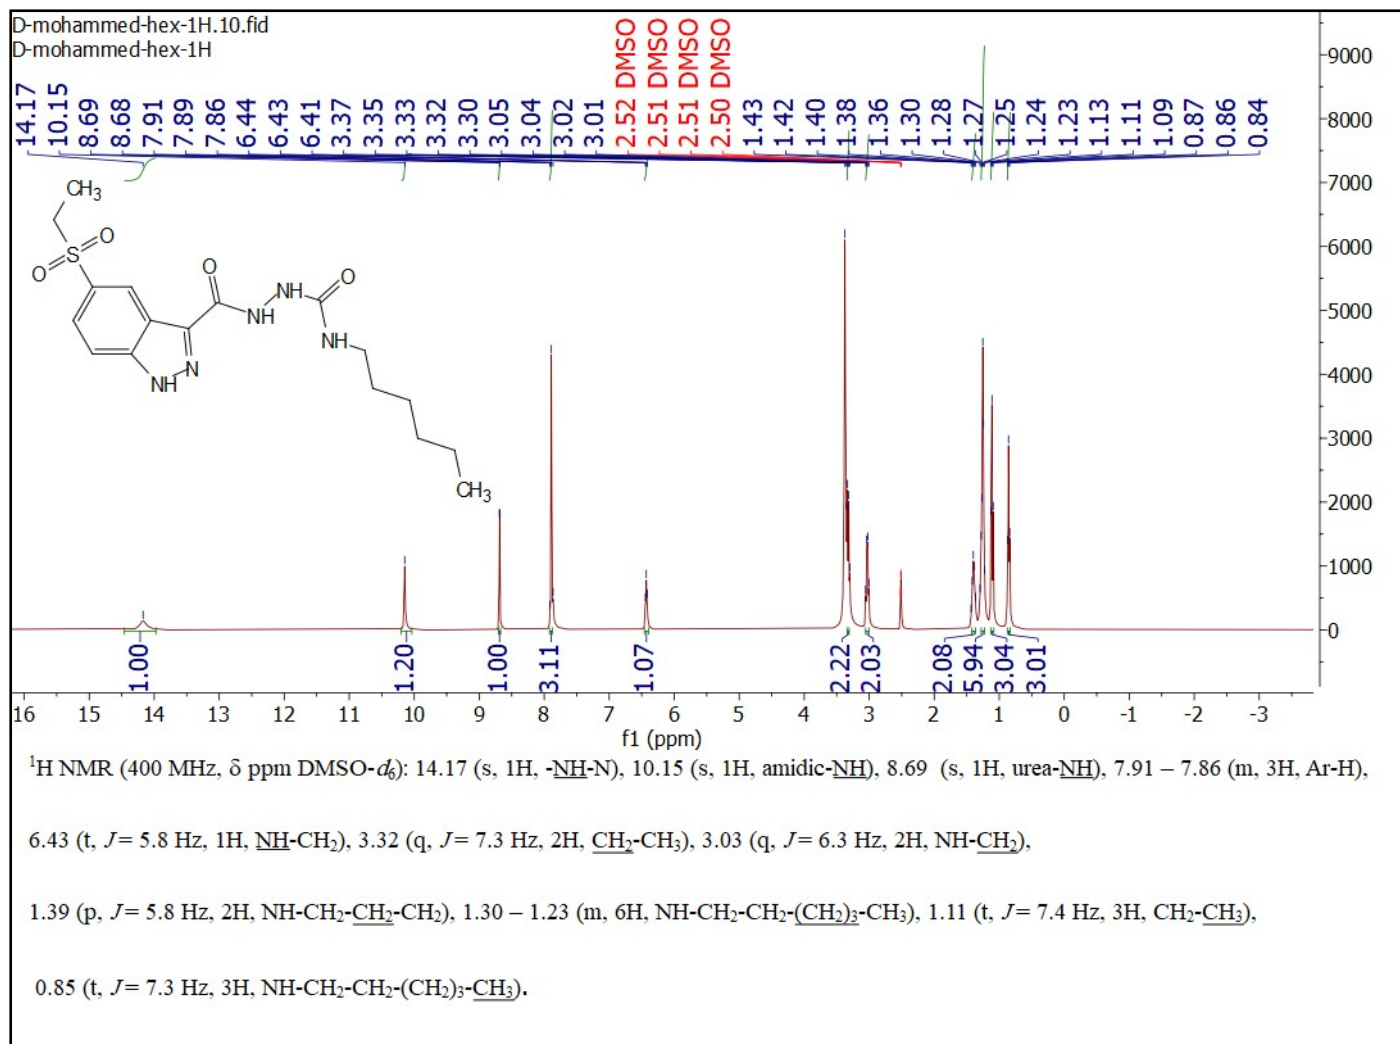

**Figure S14:**  $^{13}\text{C}$  NMR spectrum (101 MHz,  $\text{DMSO-}d_6$ ) of compound **8b**

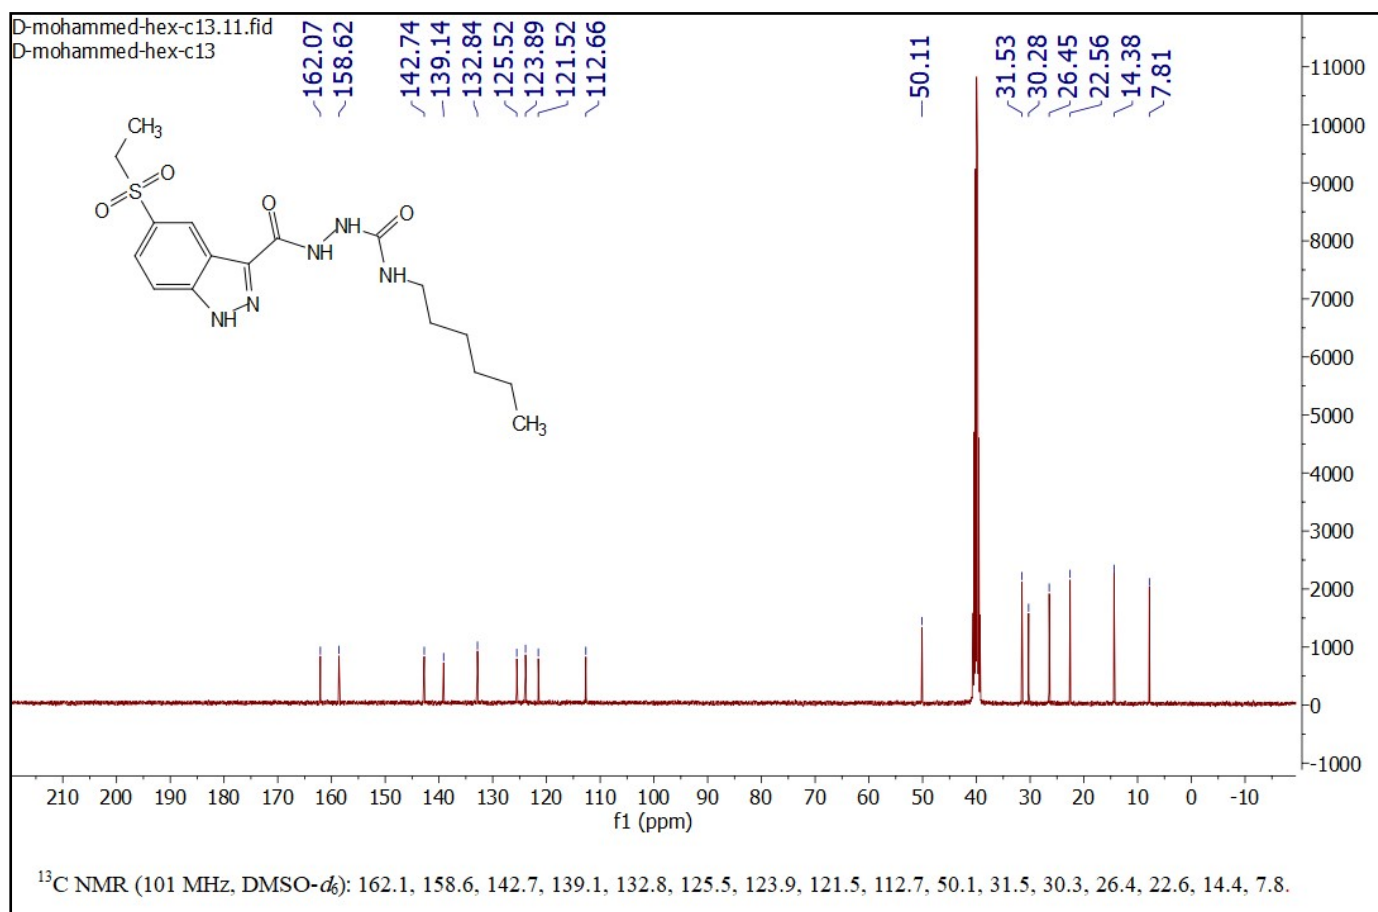

**Figure S15:**  $^1\text{H}$  NMR spectrum (400 MHz,  $\text{DMSO}-d_6$ ) of compound **8c**

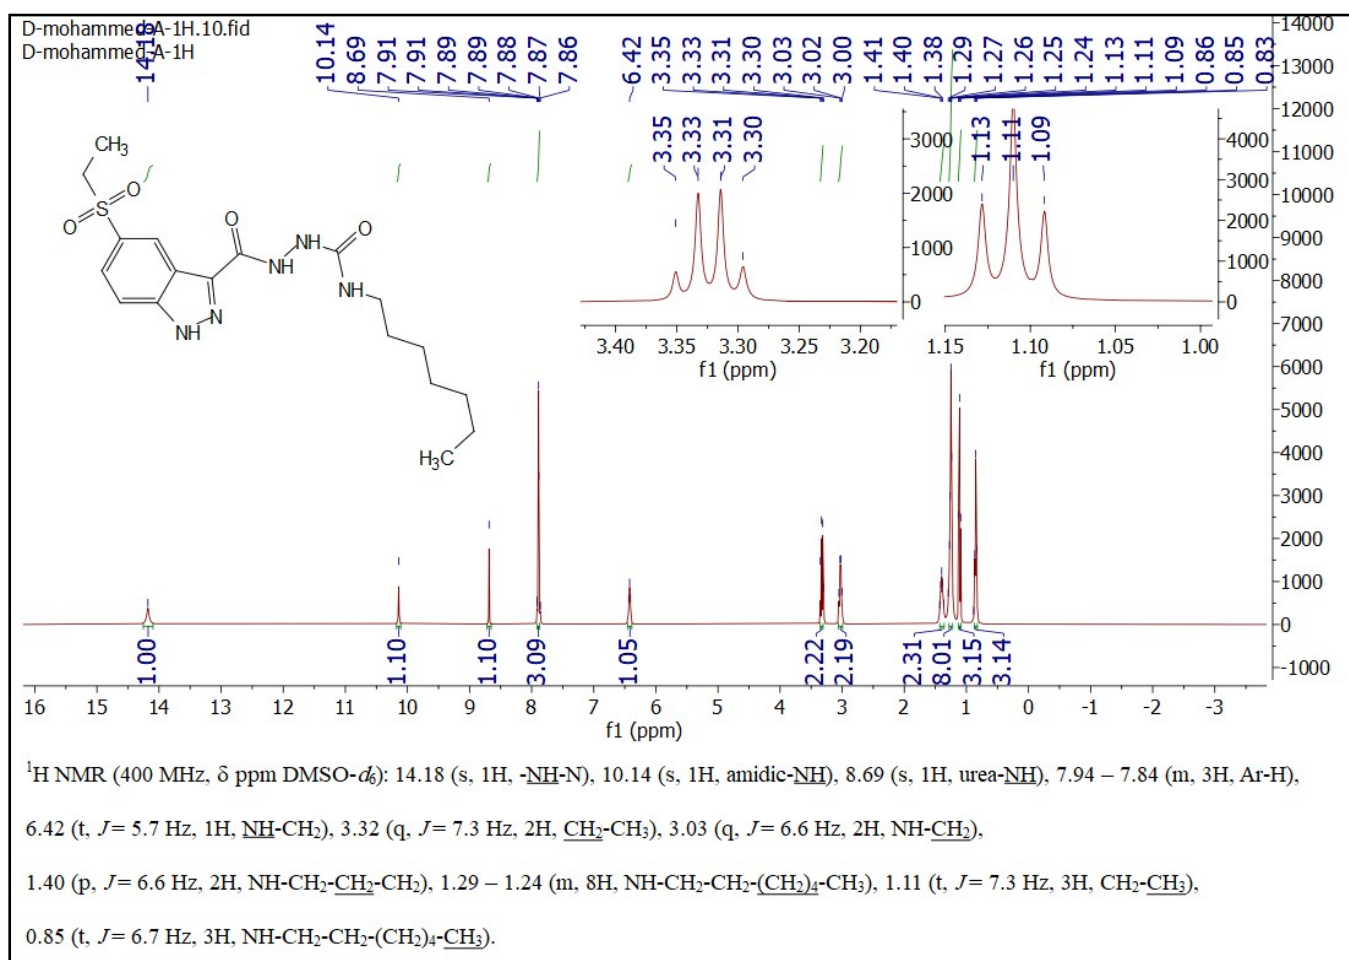

**Figure S16:**  $^{13}\text{C}$  NMR spectrum (101 MHz,  $\text{DMSO-}d_6$ ) of compound **8c**

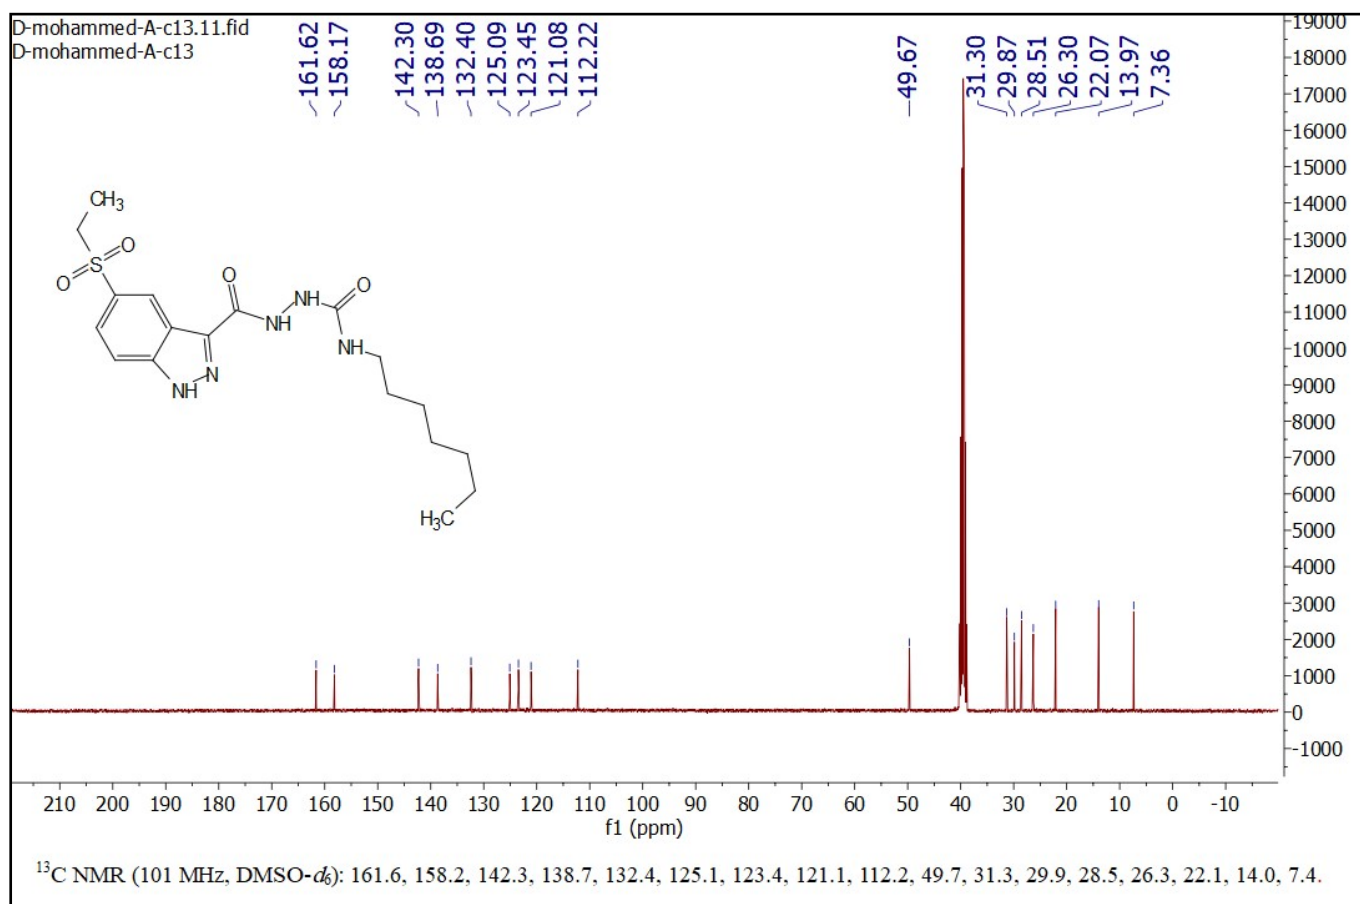

**Figure S17:**  $^1\text{H}$  NMR spectrum (400 MHz,  $\text{DMSO-}d_6$ ) of compound **8d**

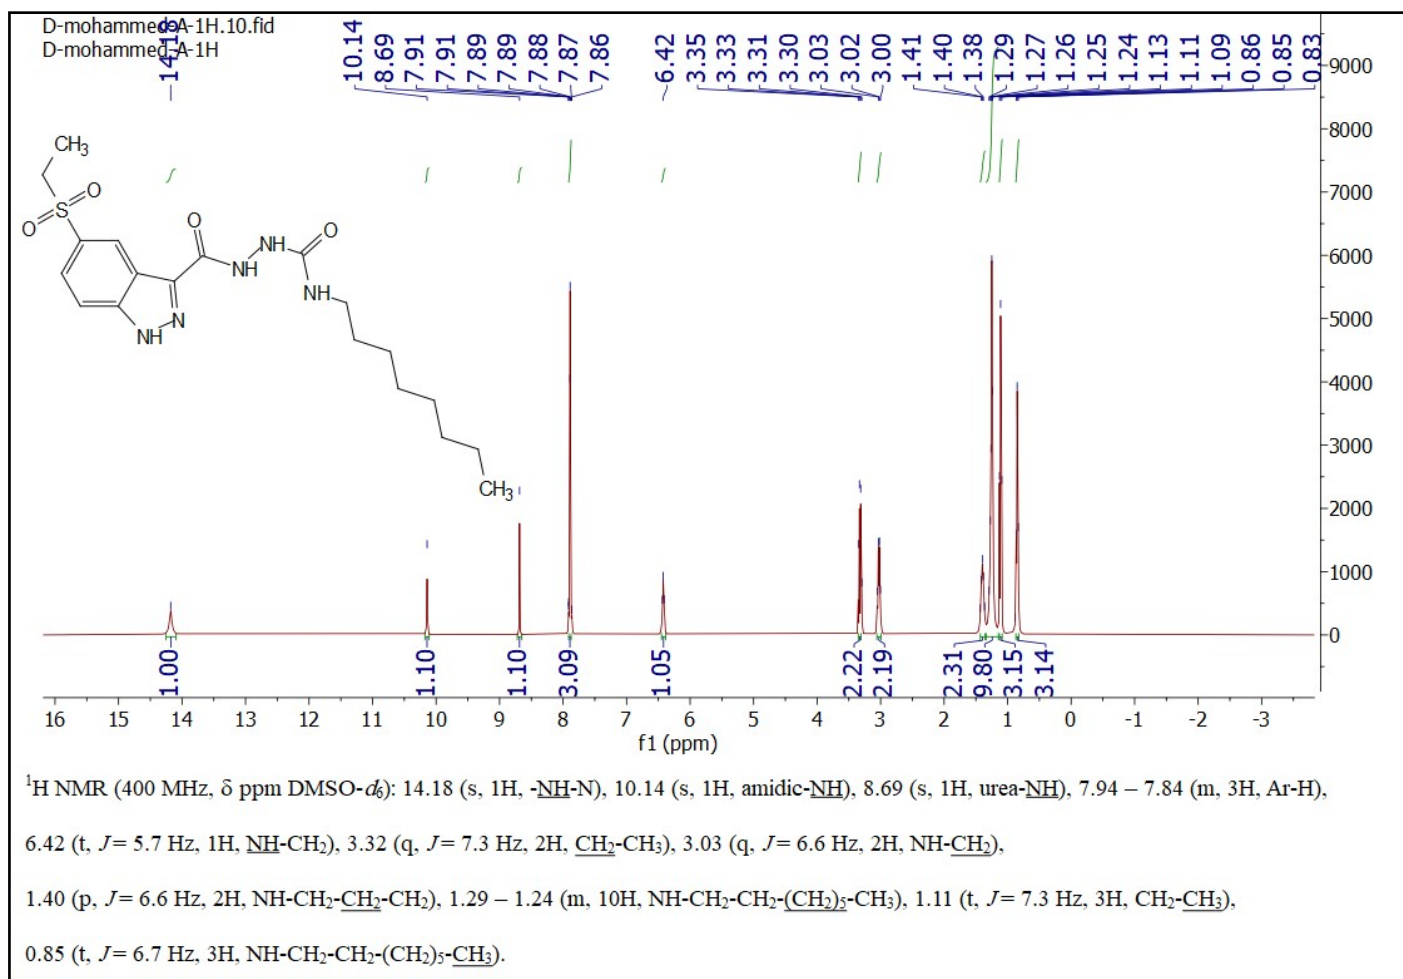

**Figure S18:**  $^{13}\text{C}$  NMR spectrum (101 MHz,  $\text{DMSO-}d_6$ ) of compound **8d**

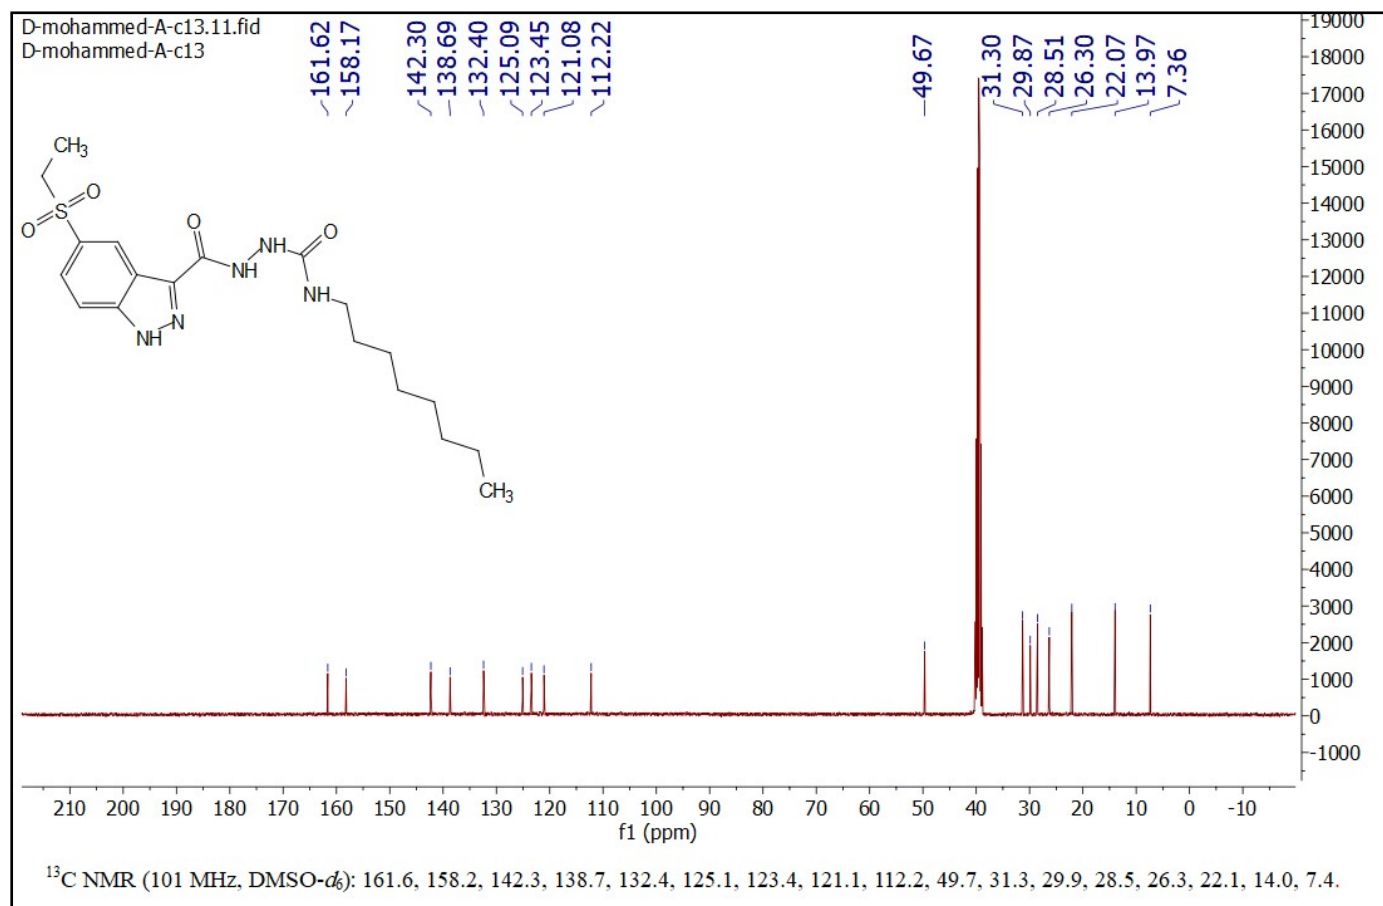

**Figure S19:**  $^1\text{H}$  NMR spectrum (400 MHz,  $\text{DMSO}-d_6$ ) of compound **8e**

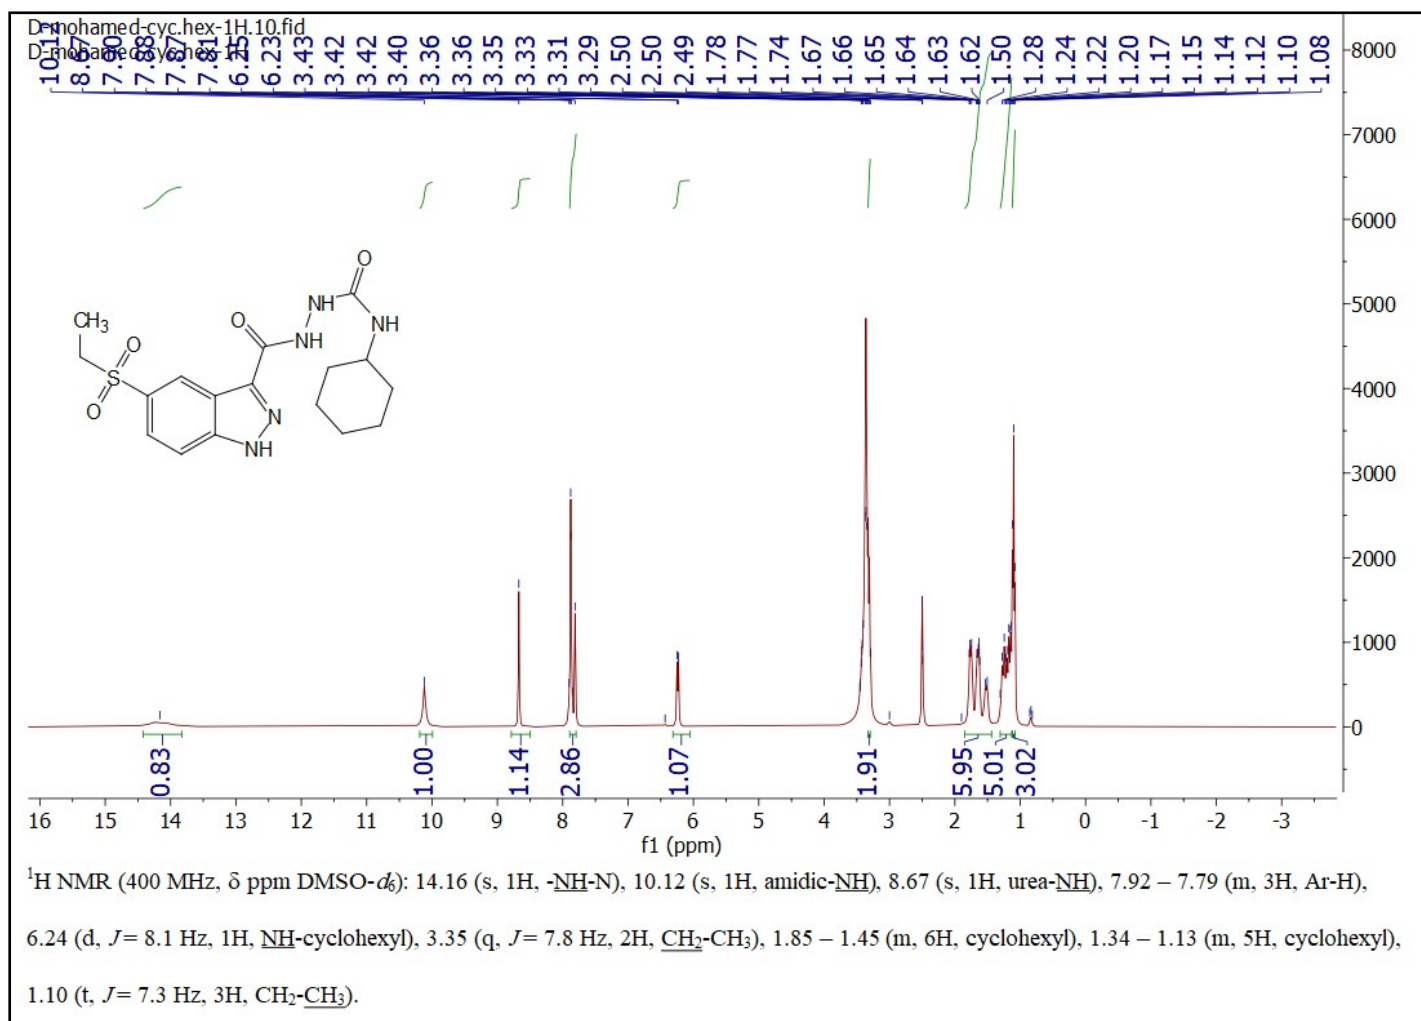

**Figure S20:**  $^{13}\text{C}$  NMR spectrum (101 MHz,  $\text{DMSO-}d_6$ ) of compound **8e**

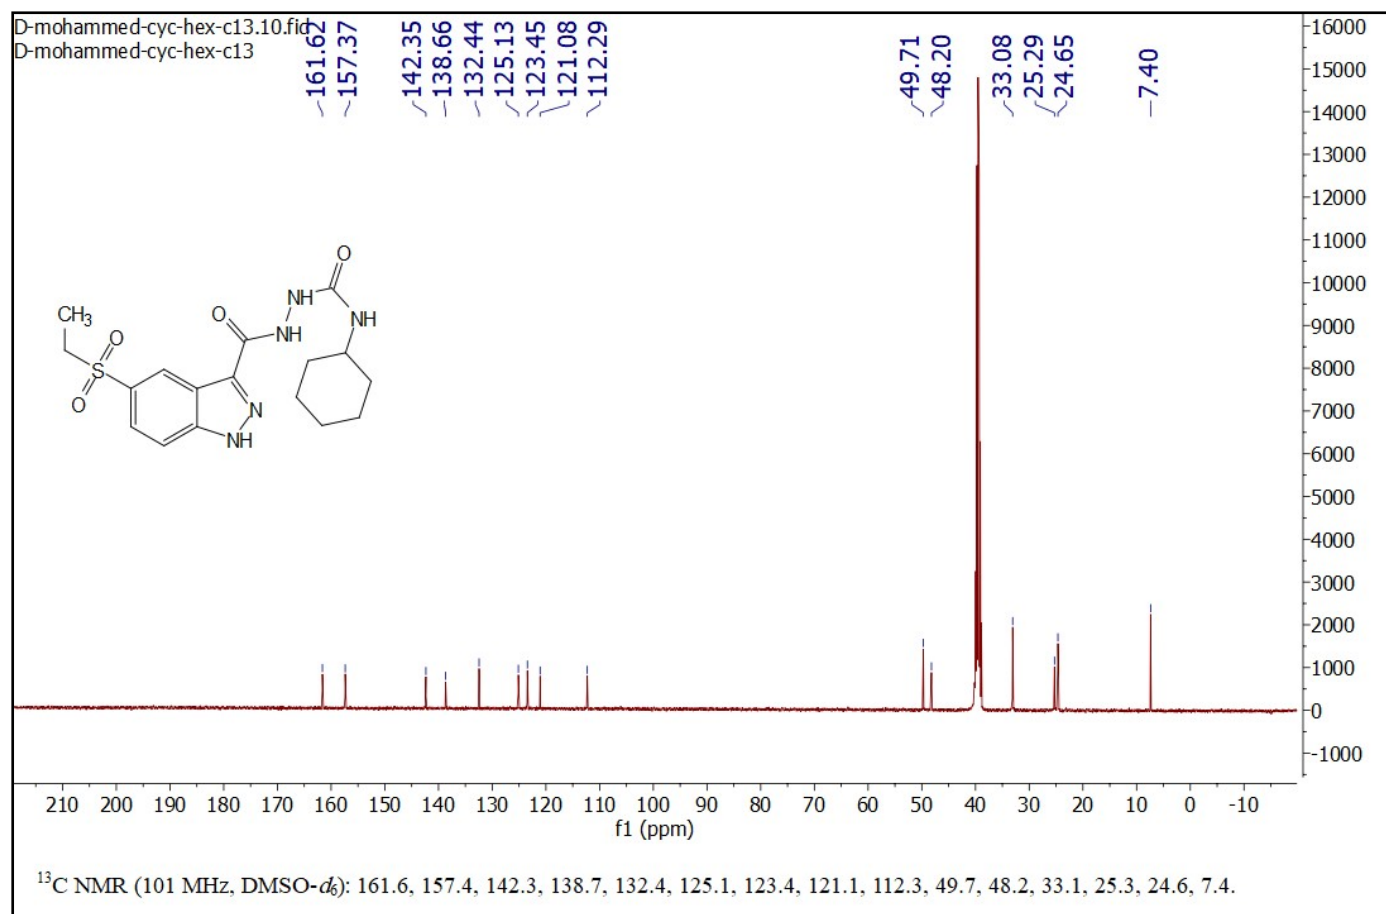

**Figure S21:**  $^1\text{H}$  NMR spectrum (400 MHz,  $\text{DMSO}-d_6$ ) of compound **8f**

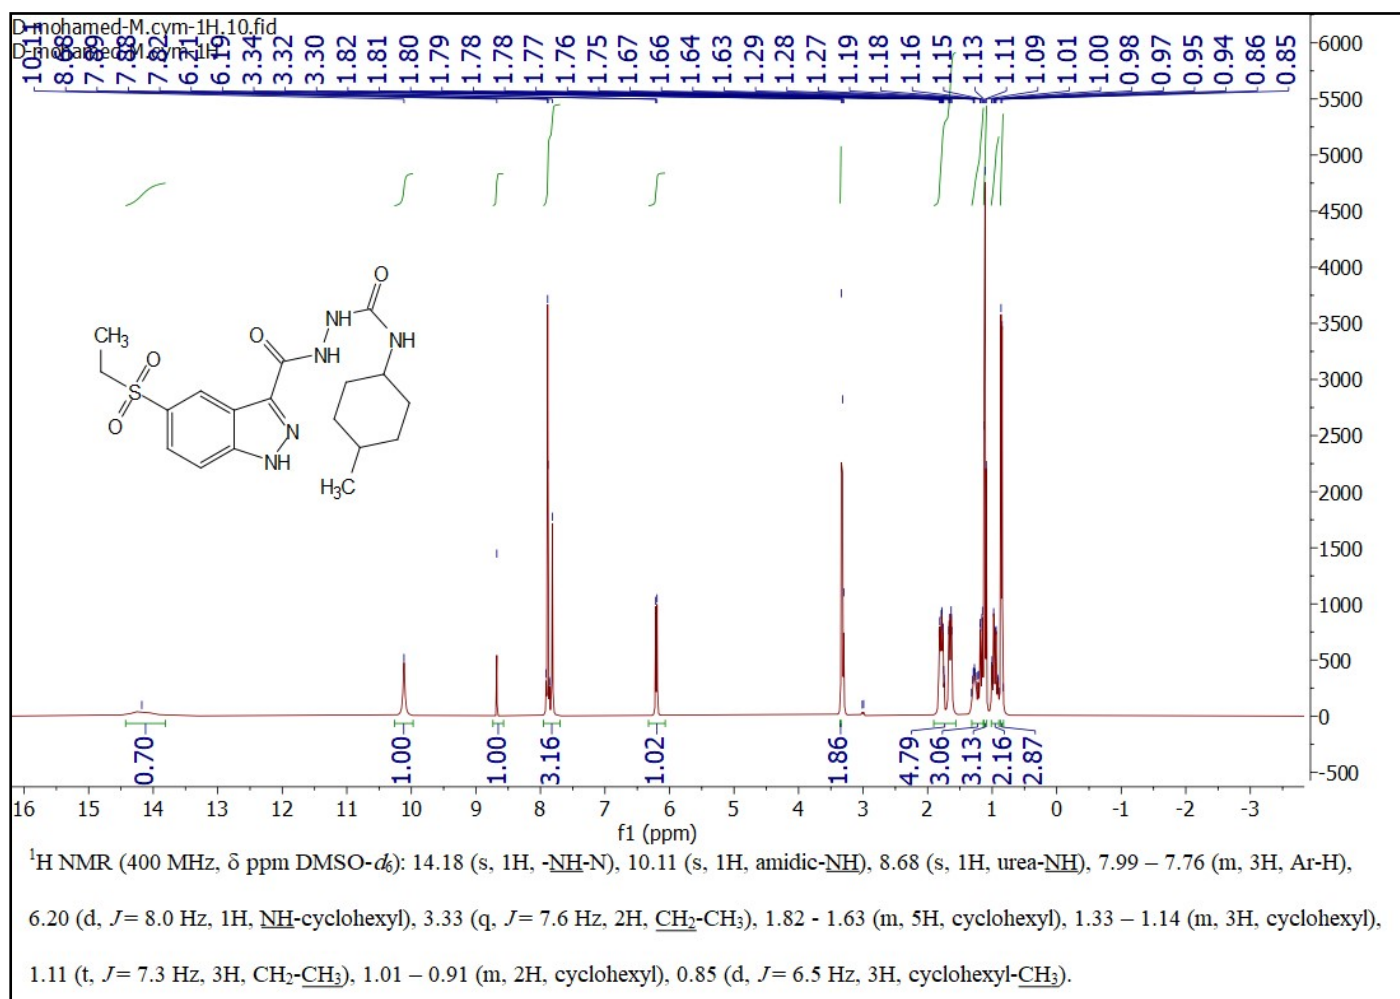

**Figure S22:**  $^{13}\text{C}$  NMR spectrum (101 MHz,  $\text{DMSO-}d_6$ ) of compound **8f**

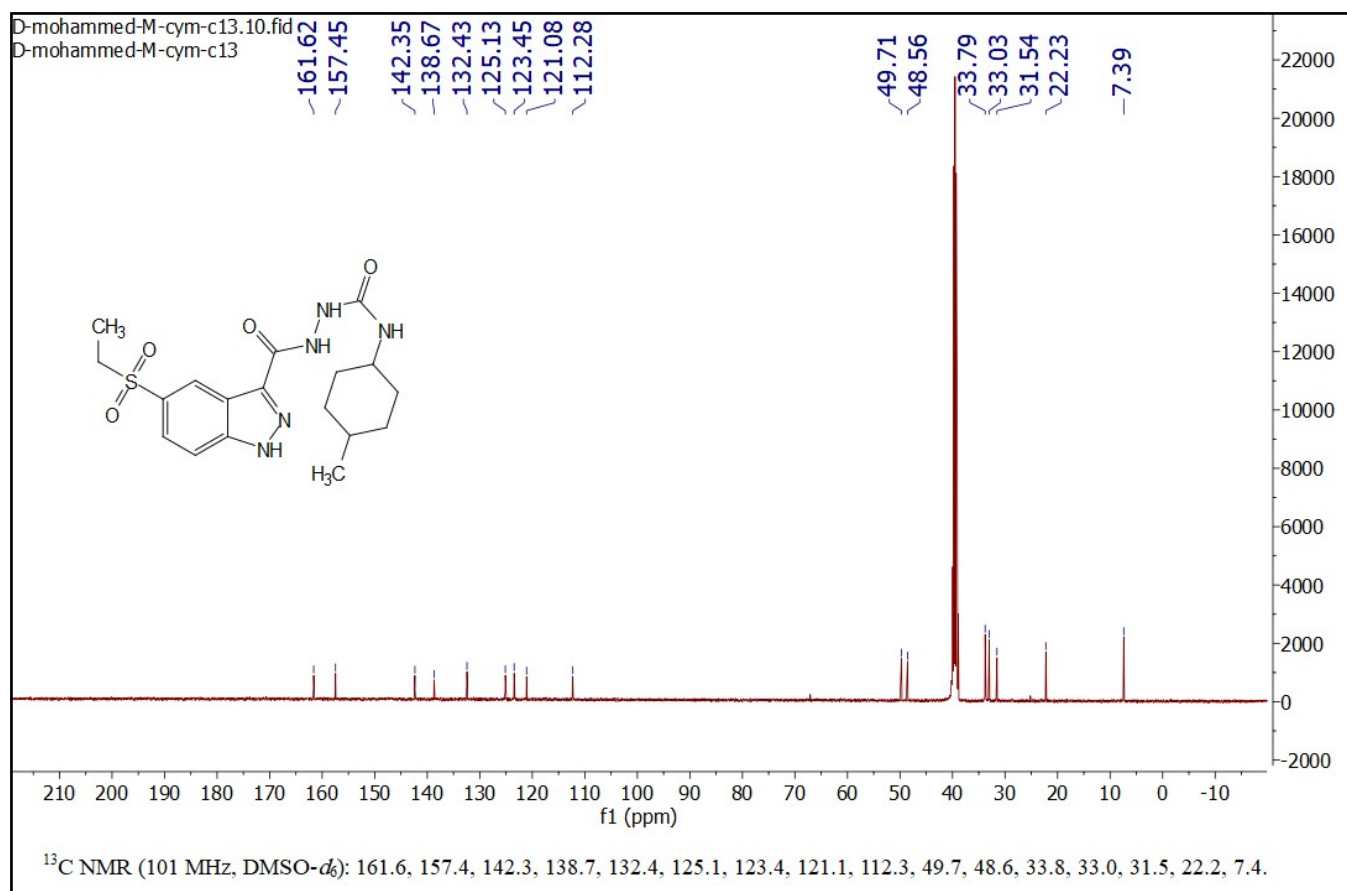

**Figure S23:**  $^1\text{H}$  NMR spectrum (400 MHz,  $\text{DMSO}-d_6$ ) of compound **8g**

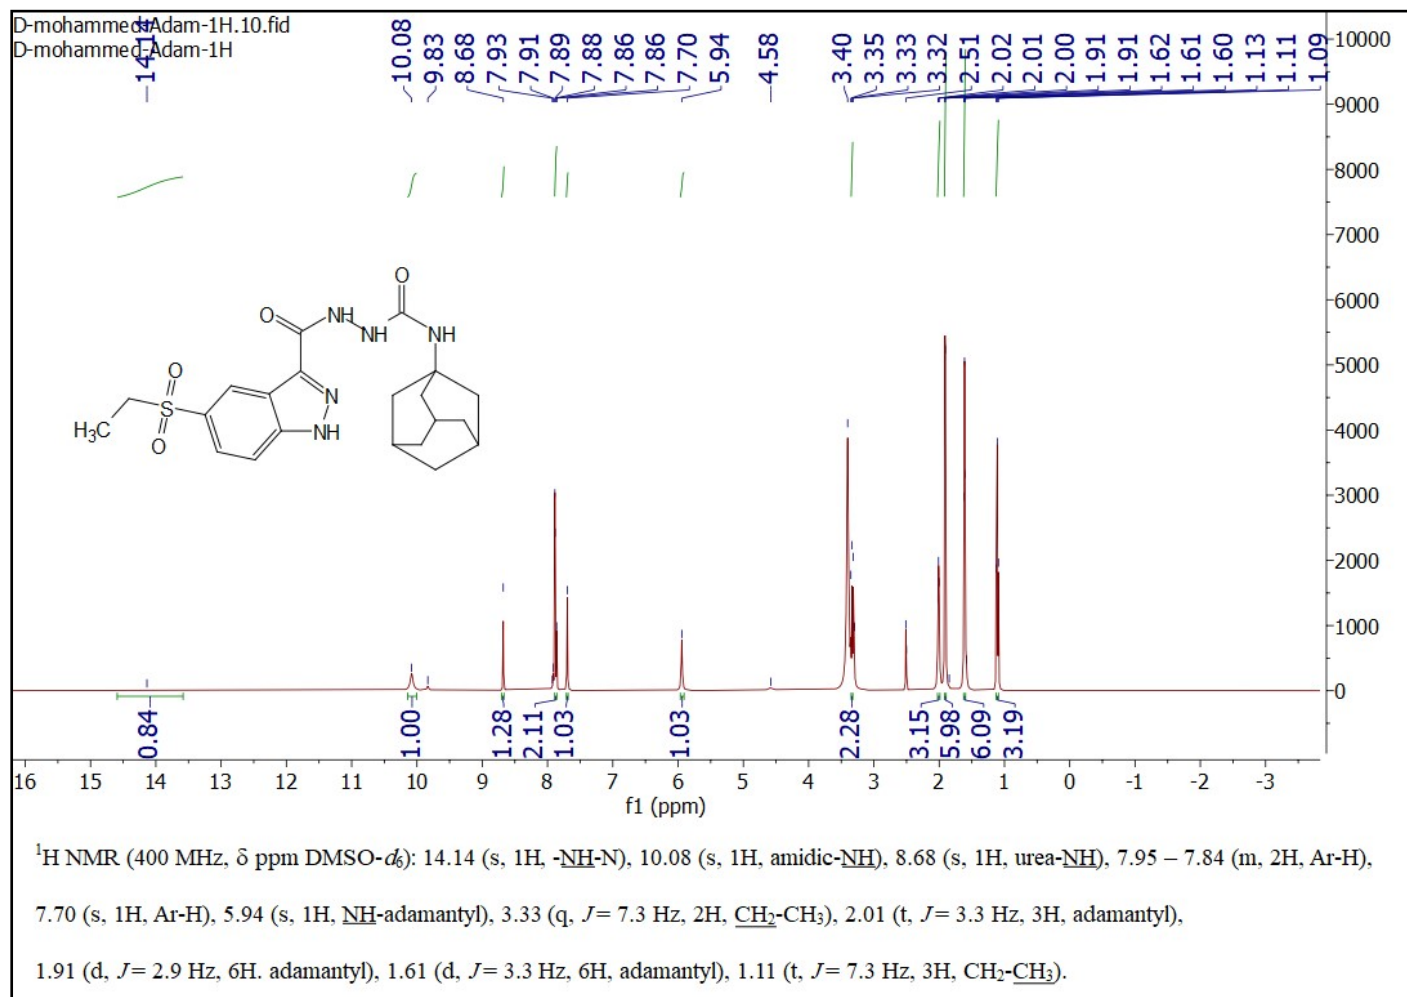

**Figure S24:**  $^{13}\text{C}$  NMR spectrum (101 MHz,  $\text{DMSO-}d_6$ ) of compound **8g**

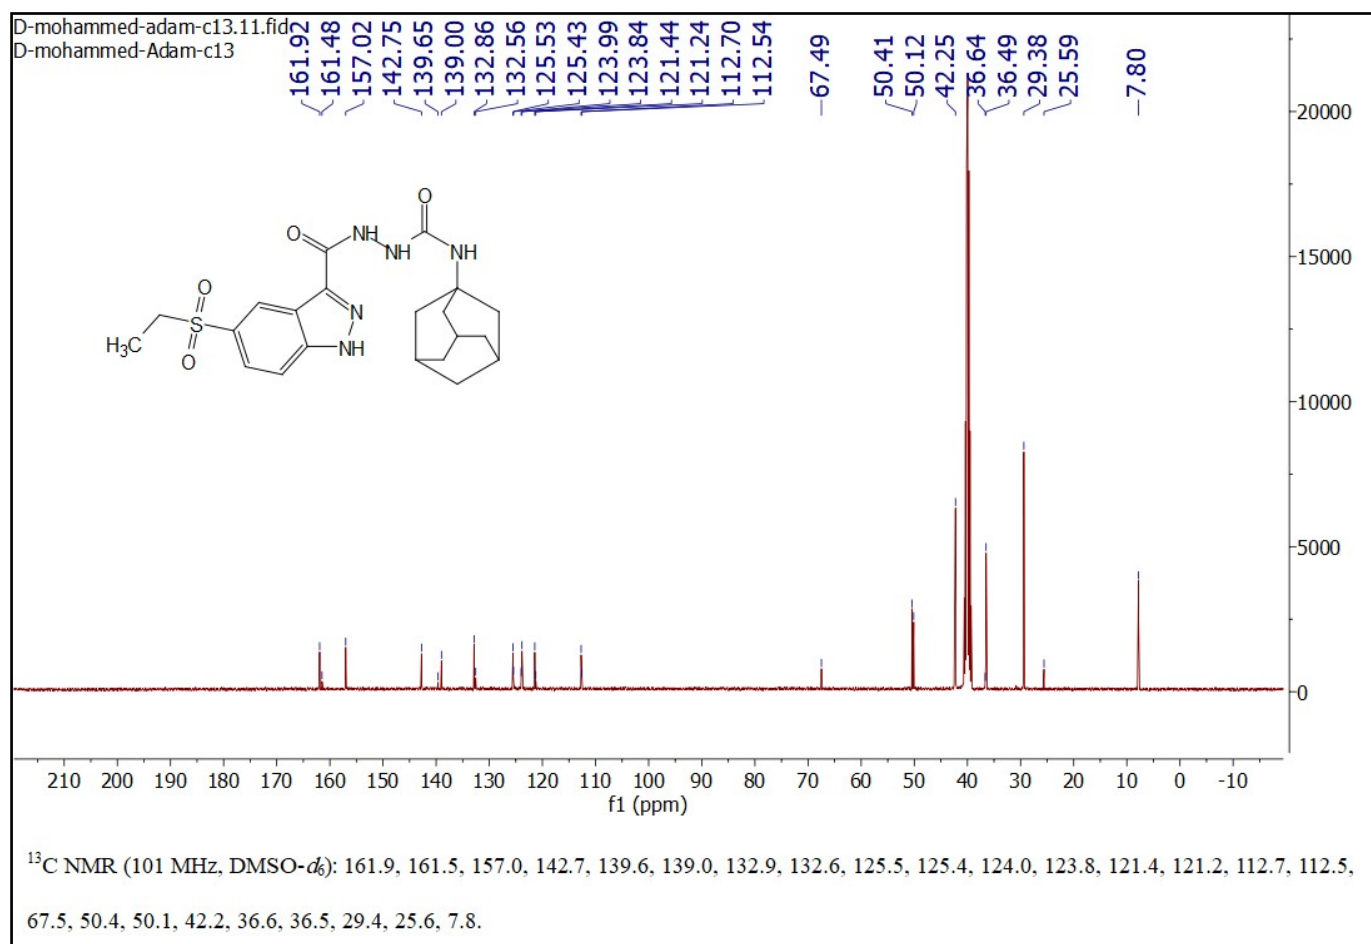

**Figure S25:**  $^1\text{H}$  NMR spectrum (400 MHz,  $\text{DMSO}-d_6$ ) of compound **8h**

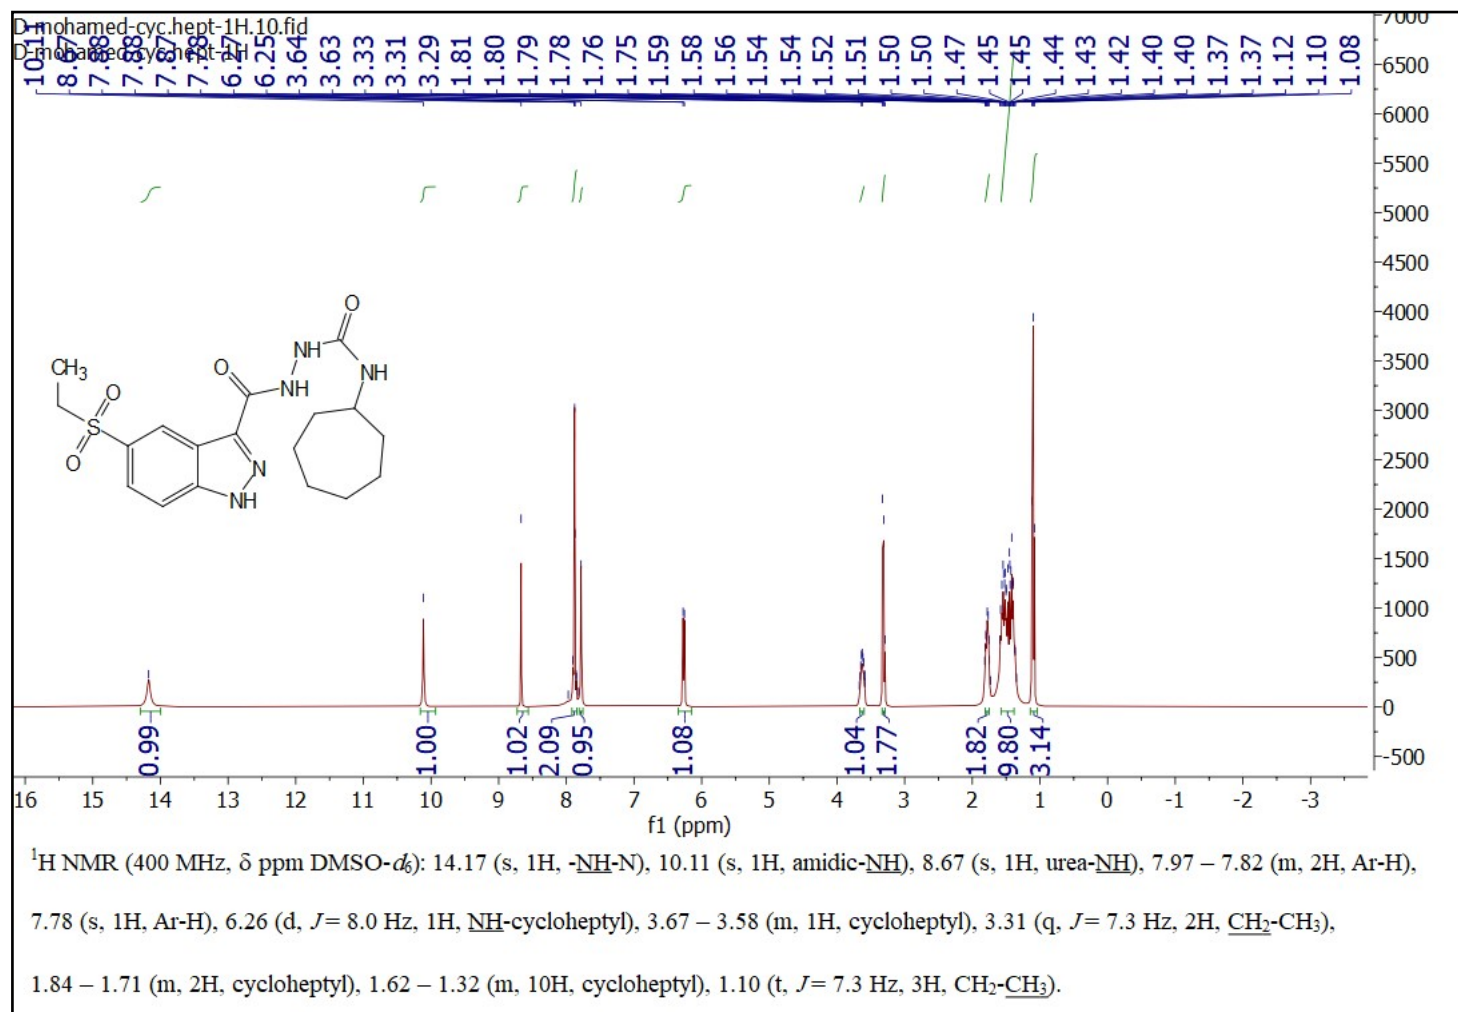

**Figure S26:**  $^{13}\text{C}$  NMR spectrum (101 MHz,  $\text{DMSO}-d_6$ ) of compound **8h**

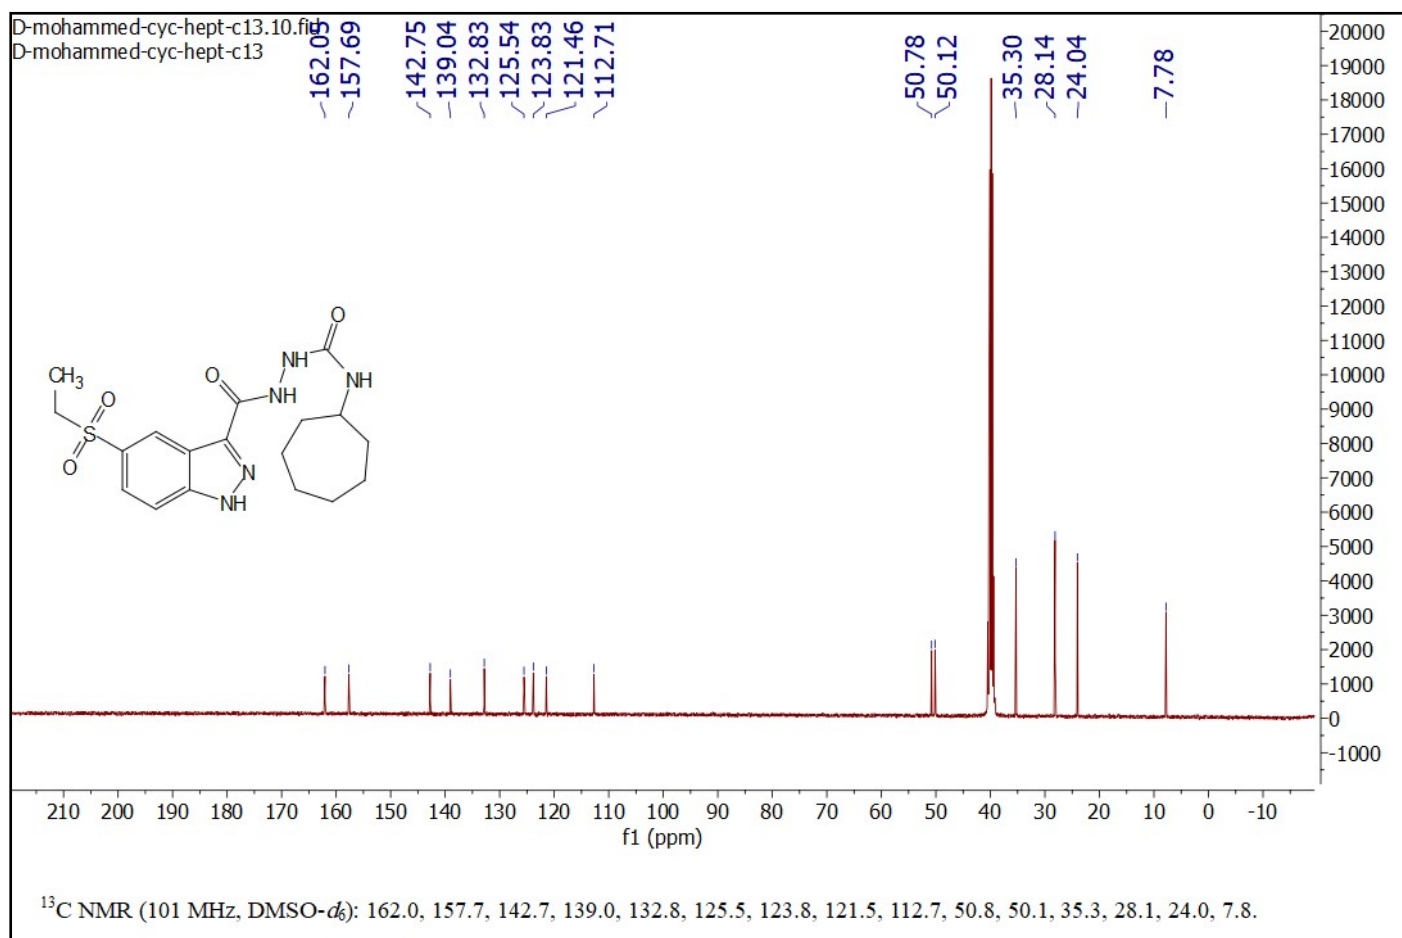

**Figure S27:**  $^1\text{H}$  NMR spectrum (400 MHz,  $\text{DMSO}-d_6$ ) of compound **8i**

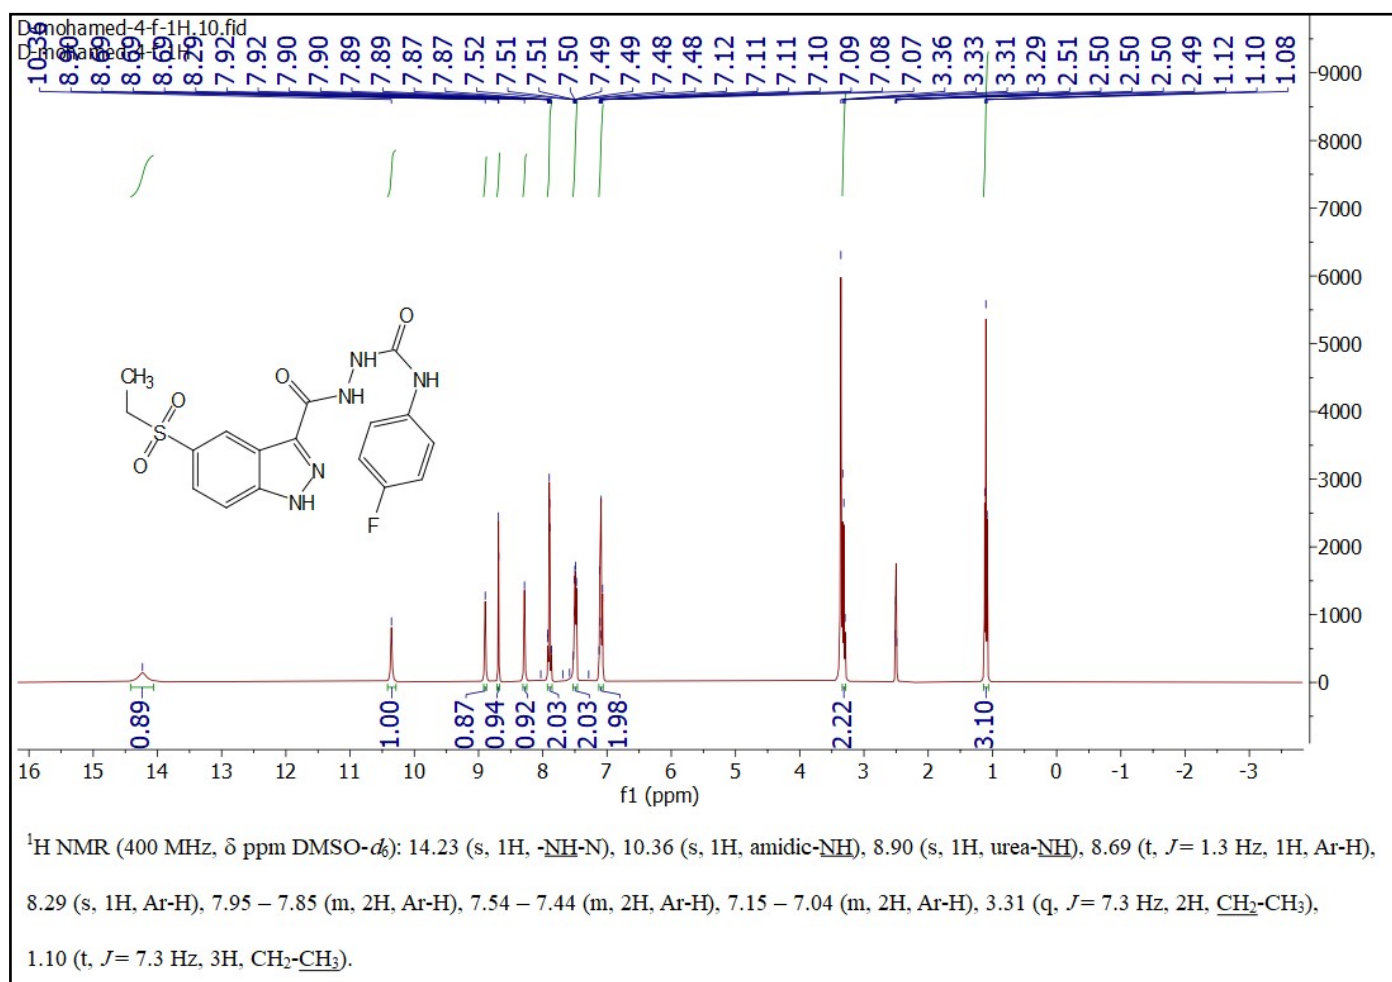

**Figure S28:**  $^{13}\text{C}$  NMR spectrum (101 MHz,  $\text{DMSO-}d_6$ ) of compound **8i**

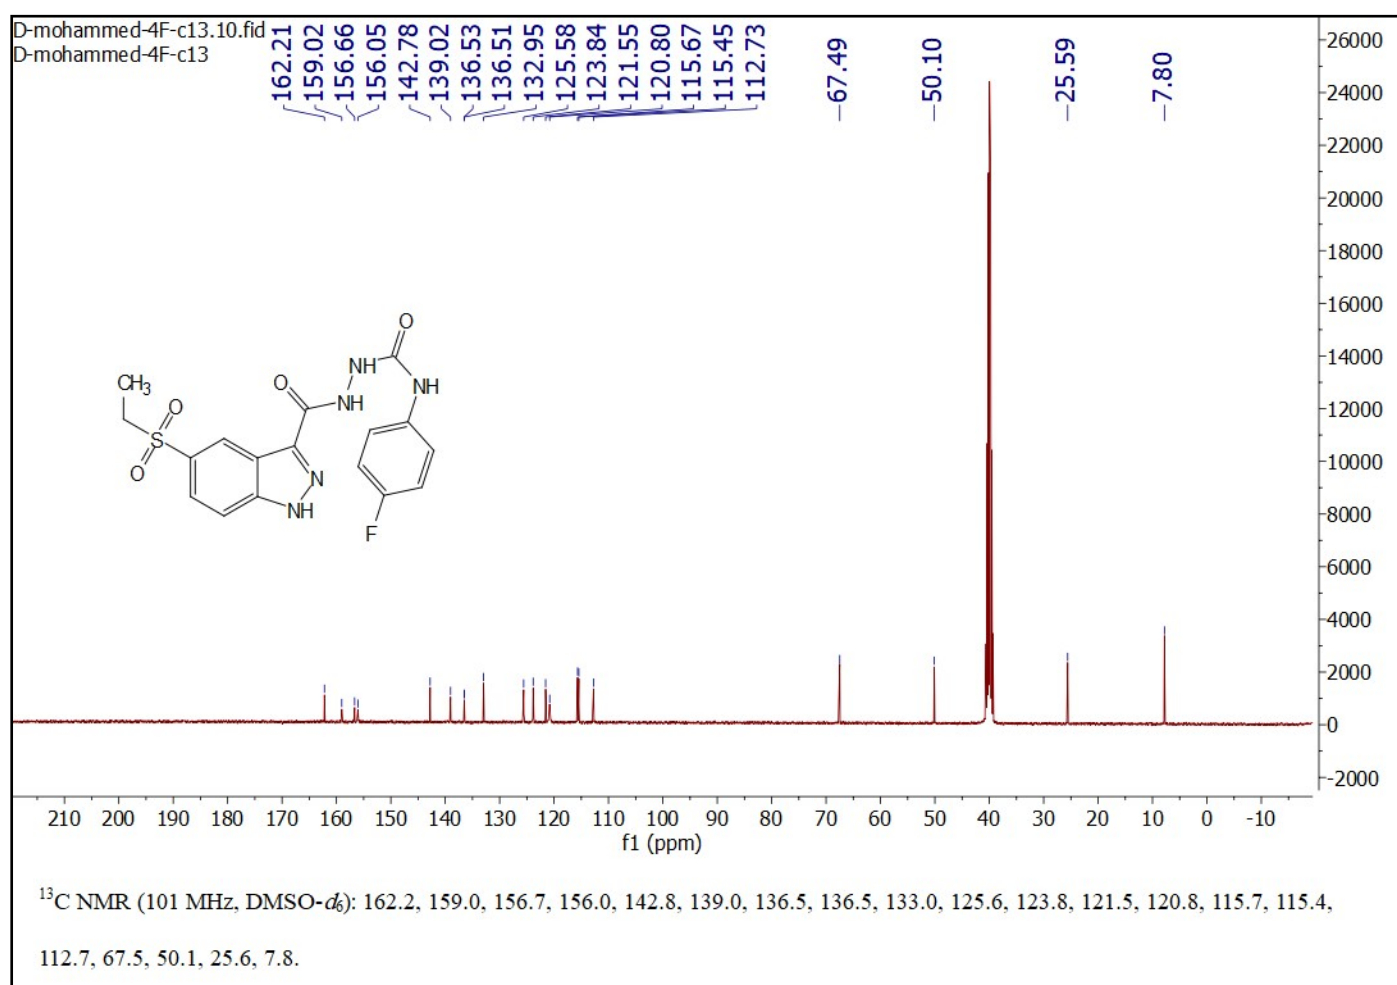

**Figure S29:**  $^1\text{H}$  NMR spectrum (400 MHz,  $\text{DMSO}-d_6$ ) of compound **8j**

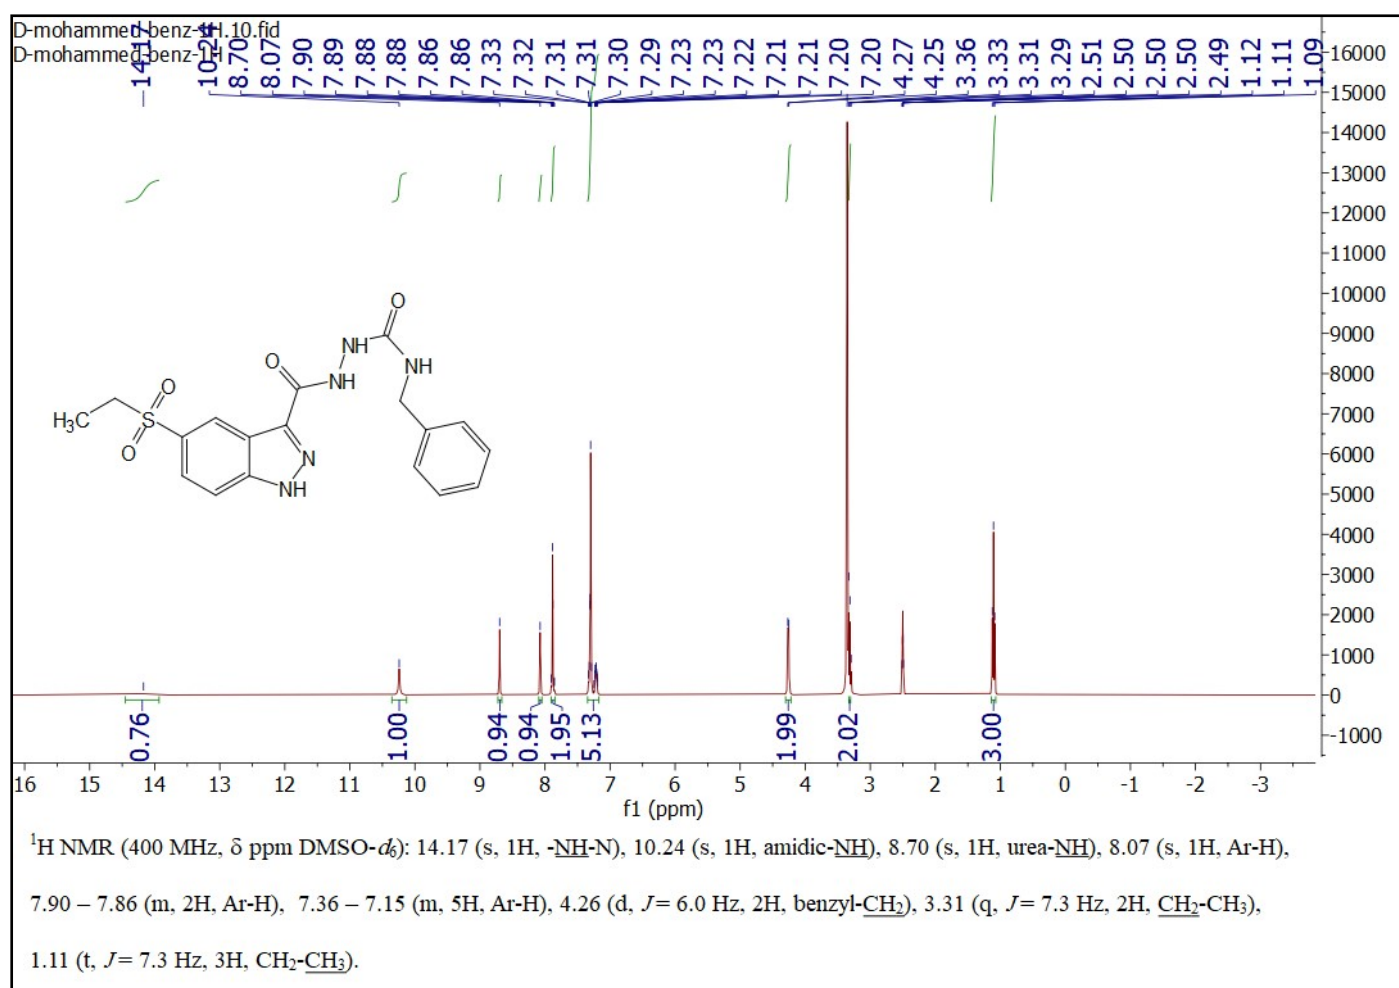

**Figure S30:**  $^{13}\text{C}$  NMR spectrum (101 MHz,  $\text{DMSO}-d_6$ ) of compound **8j**

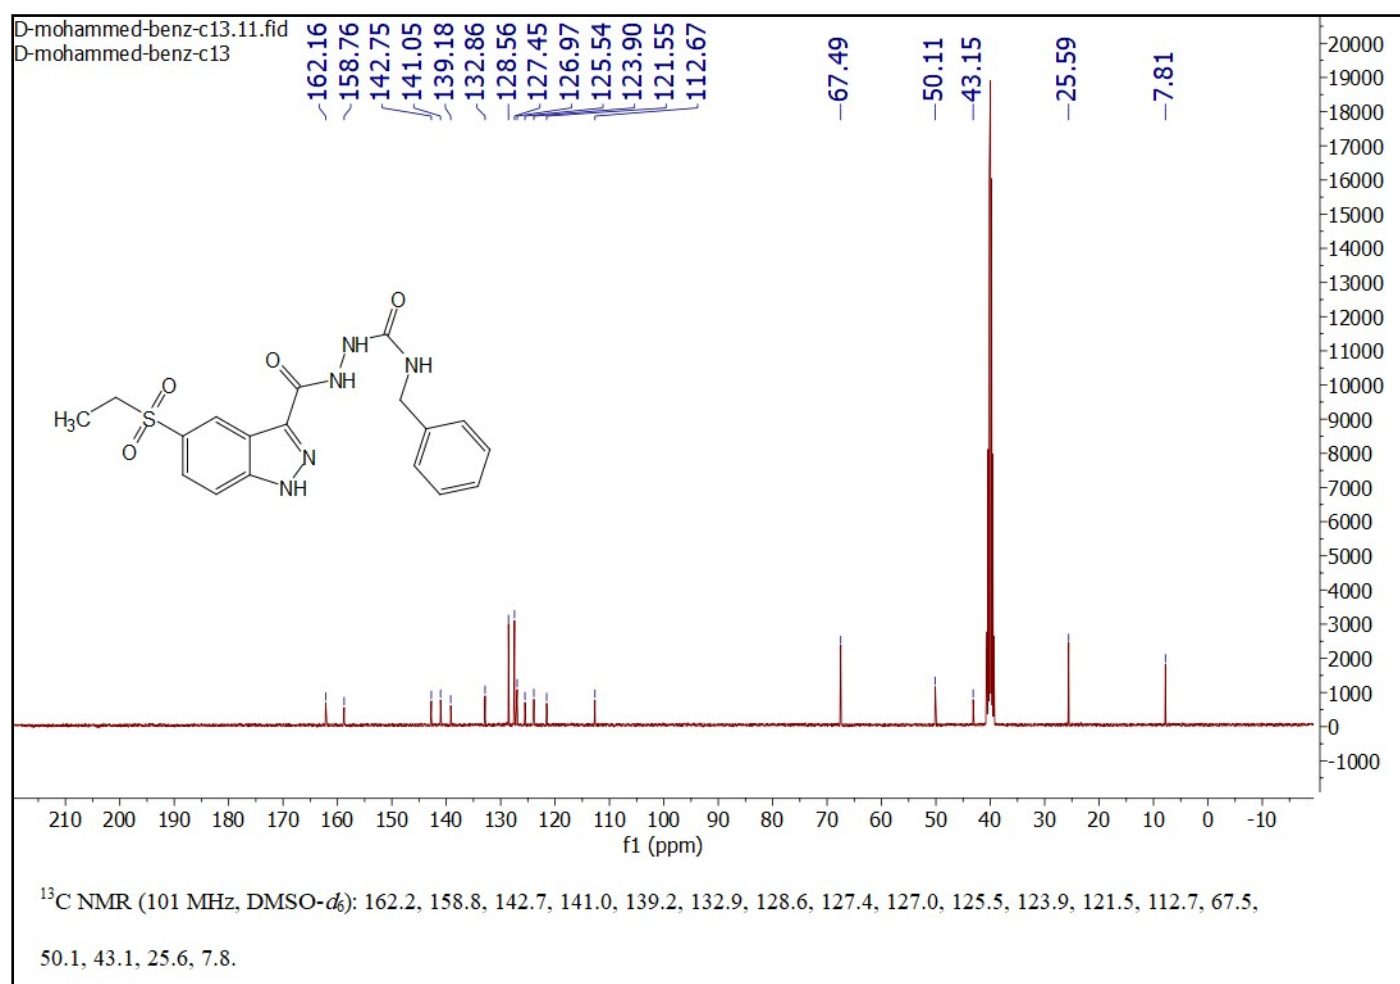

**Figure S31:**  $^1\text{H}$  NMR spectrum (400 MHz,  $\text{DMSO}-d_6$ ) of compound **8k**

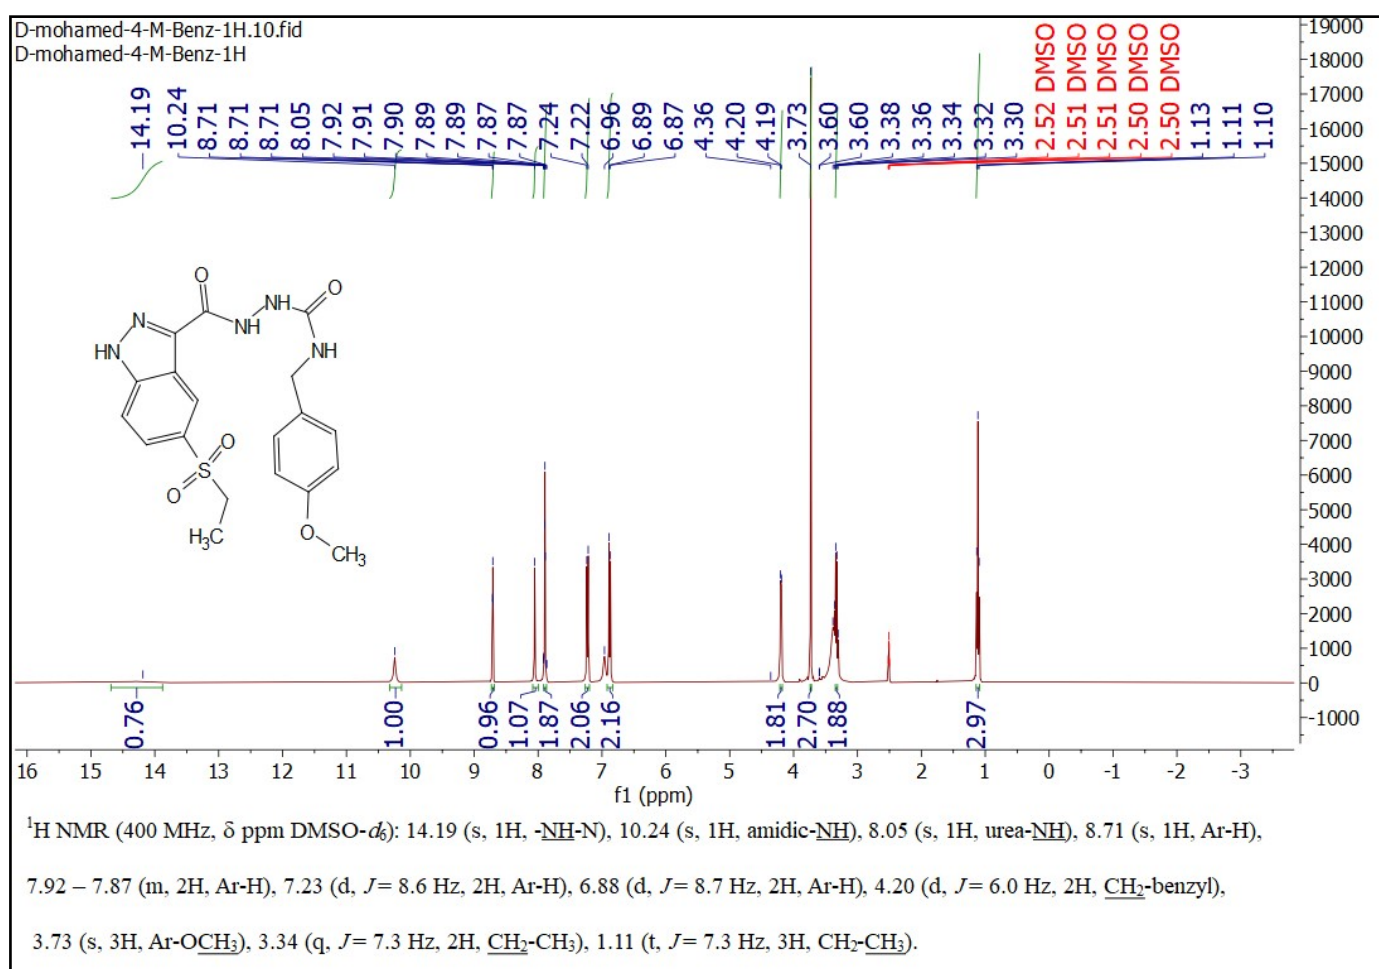

**Figure S32:**  $^{13}\text{C}$  NMR spectrum (101 MHz,  $\text{DMSO}-d_6$ ) of compound **8k**

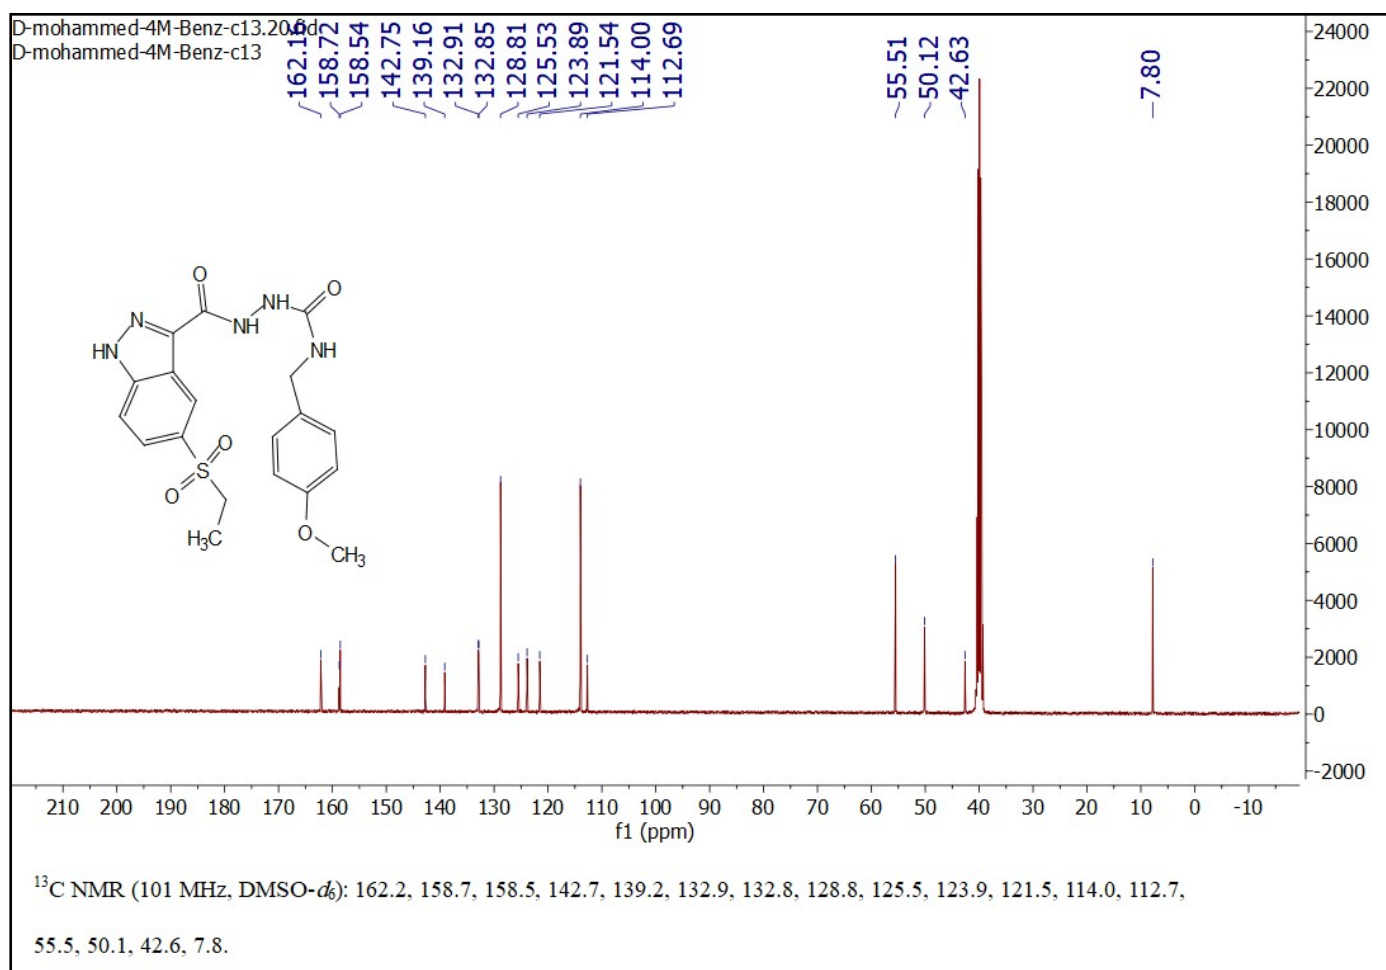

**Figure S33:**  $^1\text{H}$  NMR spectrum (400 MHz,  $\text{DMSO-}d_6$ ) of compound **8l**

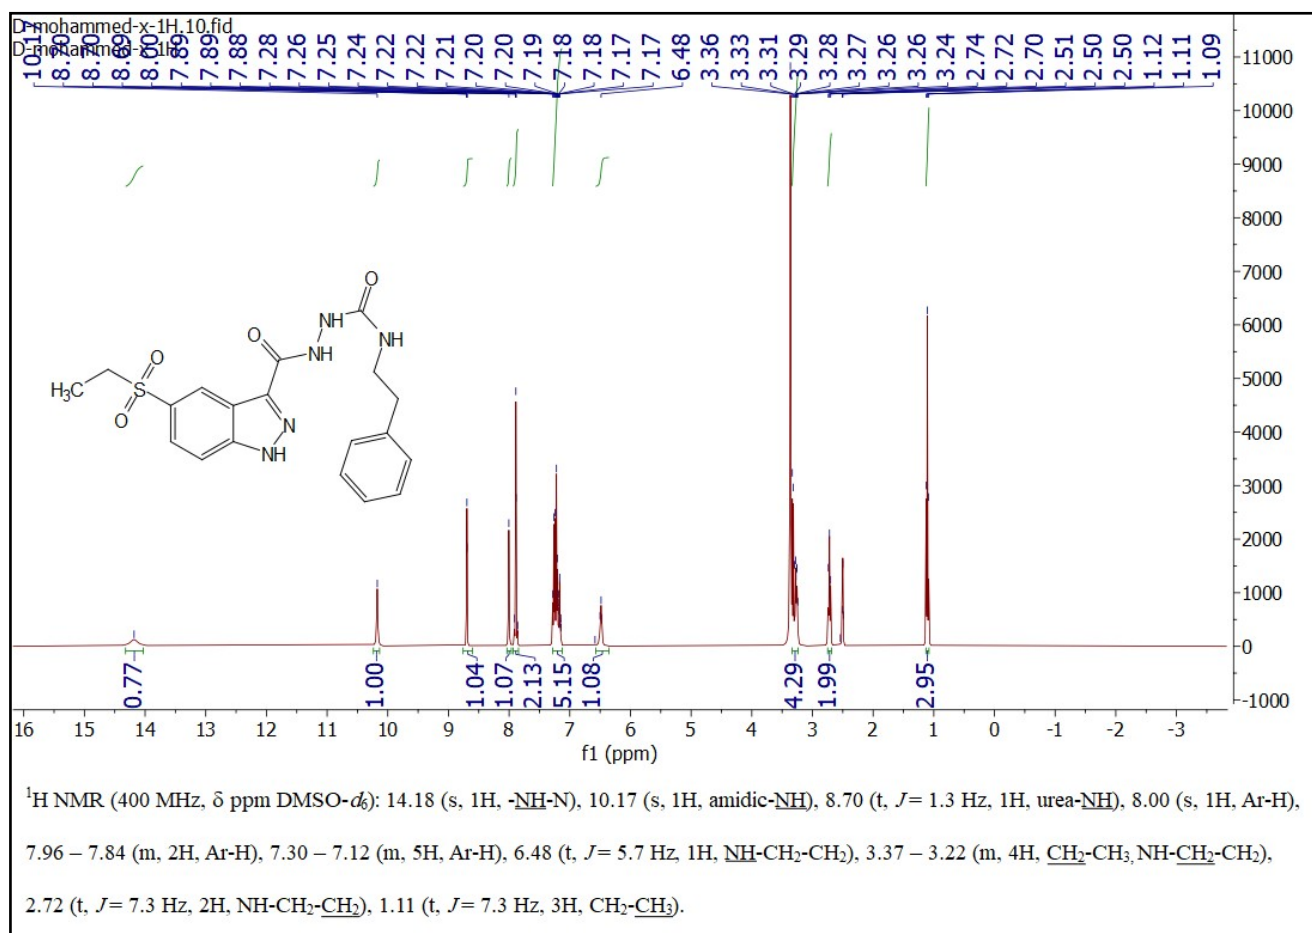

**Figure S34:**  $^{13}\text{C}$  NMR spectrum (101 MHz,  $\text{DMSO}-d_6$ ) of compound **8I**

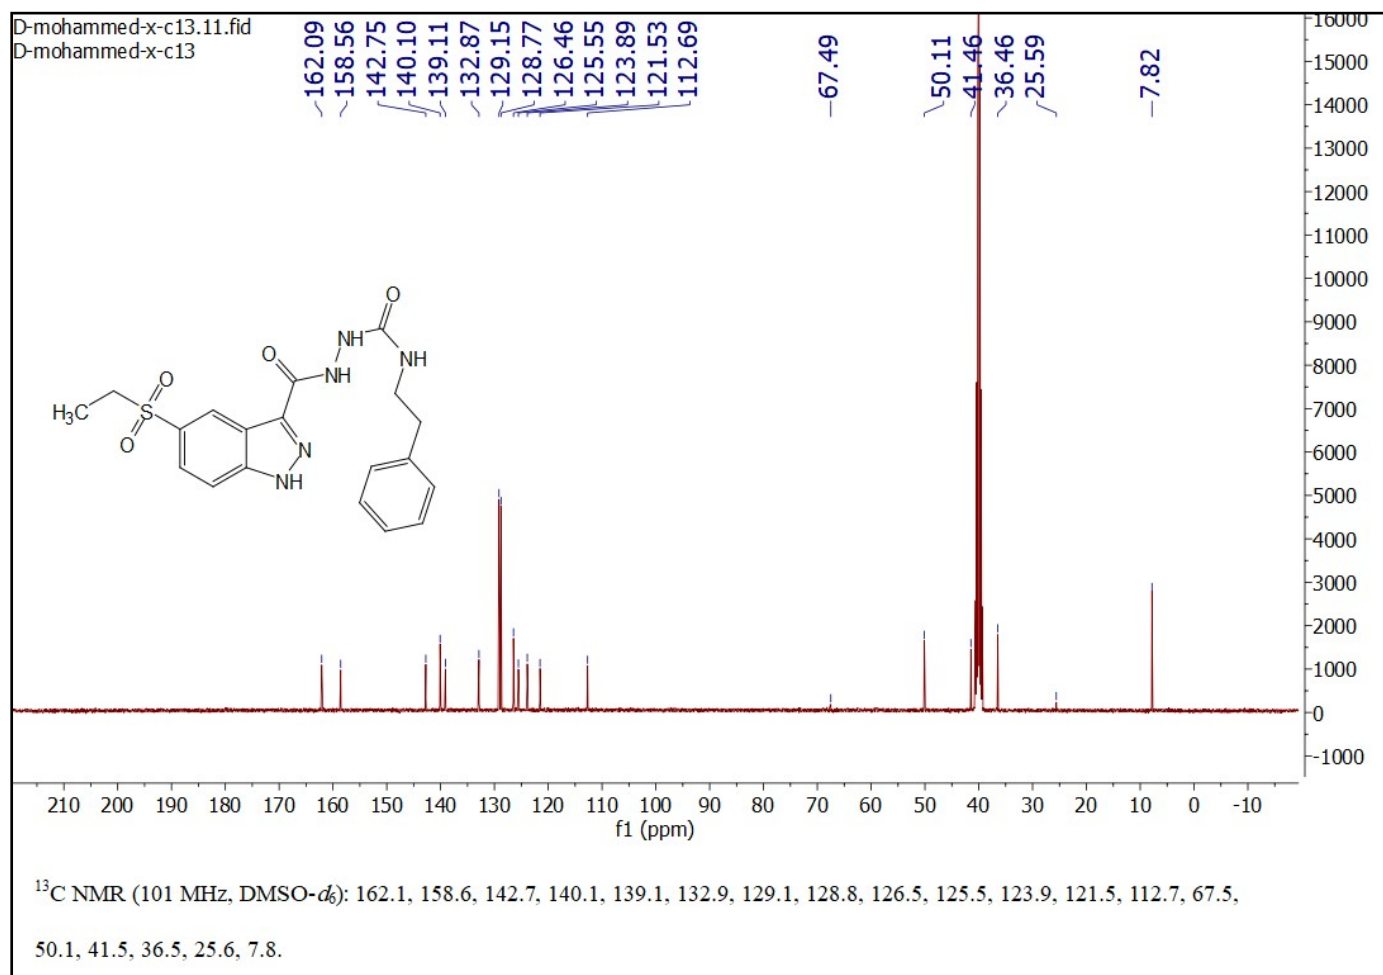

## **Appendix A**

### **4. EXPERIMENTAL**

#### **4.1. Chemistry**

##### **Materials and methods**

All reagents and solvents were of general purpose or analytical grade and purchased from Sigma Aldrich Ltd, Fisher Scientific, Fluka and Acros.  $^1\text{H}$  and  $^{13}\text{C}$  NMR spectra were recorded with a Bruker Avance III spectrometer operating at 400, 100 MHz respectively, with  $\text{Me}_4\text{Si}$  as internal standard and  $\text{DMSO-d}_6$  as a solvent. Elemental analysis was performed by the regional center for mycology and biotechnology (Cairo, Egypt). TLC was carried out on precoated silica plates (Keisel gel 60 F254, BDH) using Hexane: Ethyl acetate, 1 : 2, v/v. Compounds were visualized by illumination under UV light (254 nm). Melting points were determined on an electrothermal instrument and are uncorrected. All solvents were dried prior to use and stored over 4 Å molecular sieves, under nitrogen. All the compounds were  $\geq 95\%$  pure.

#### **4.2. Biological evaluation**

##### **4.2.1 Cell Viability assay (MTT assay)**

MTT assay was performed to investigate the effect of the synthesized compounds on mammary epithelial cells (MCF-10A). The cells were propagated in medium consisting

of Ham's F-12 medium/ Dulbecco's modified Eagle's medium (DMEM) (1:1) supplemented with 10% foetal calf serum (GIBCO, UK), 2 mM glutamine, insulin (10  $\mu\text{g/mL}$ ), hydrocortisone (500 ng/mL) and epidermal growth factor (20 ng/mL). Trypsin ethylenediamine tetra acetic acid (EDTA) was used to passage the cells after every 2-3 days. 96-well flat-bottomed cell culture plates were used to seed the cells at a density of  $10^4$  cells  $\text{mL}^{-1}$ . The medium was aspirated from all the wells of culture plates after 24 h followed by the addition of synthesized compounds (in 200  $\mu\text{L}$  medium to yield a final concentration of 0.1% (v/v) dimethyl sulfoxide) into individual wells of the plates. Four wells were designated to a single compound. The plates were allowed to incubate at  $37^\circ\text{C}$  for 96 h. Afterwards, the medium was aspirated and 3-[4,5-dimethylthiazol-2-yl]-2,5-diphenyltetrazolium bromide (MTT) (0.4 mg/mL) in medium was added to each well and subsequently incubated for 3 h. The medium was aspirated and 150  $\mu\text{L}$  dimethyl sulfoxide (DMSO) was added to each well. The plates were vortexed followed by the measurement of absorbance at 540 nm on a microplate reader. The results were presented as inhibition (%) of proliferation in contrast to controls comprising 0.1% DMSO.

#### **4.2.2. Assay for antiproliferative effect**

To explore the antiproliferative potential of compounds propidium iodide fluorescence assay was performed using two different cell lines; HCT-116 (colorectal cancer cell line) and MCF-7 (breast cancer cell line) [MCF-7 (RRID:CVCL\_0031)] All cell lines were obtained from ATCC (American Type Cell Culture).

To calculate the total nuclear DNA, a fluorescent dye (propidium iodide, PI) is used which can attach to the DNA, thus offering a quick and precise technique. PI cannot pass through the cell membrane and its signal intensity can be considered as directly proportional to quantity of cellular DNA. Cells whose cell membranes are damaged or

have changed permeability are counted as dead ones. The assay was performed by seeding the cells of different cell lines at a density of 3000-7500 cells/well (in 200 µl medium) in culture plates followed by incubation for 24 h at 37 °C in humidified 5% CO<sub>2</sub> /95% air atmospheric conditions. The medium was removed; the compounds were added to the plates at 10 µM concentrations (in 0.1% DMSO) in triplicates, followed by incubation for 48 h. DMSO (0.1%) was used as control. After incubation, medium was removed followed by the addition of PI (25 µl, 50 µg/mL in water/medium) to each well of the plates. At -80 °C, the plates were allowed to freeze for 24 h, followed by thawing at 25 °C. A fluorometer (Polar-Star BMG Tech) was used to record the readings at excitation and emission wavelengths of 530 and 620 nm for each well. The percentage cytotoxicity of compounds was calculated using the following formula:

$$\% \text{ Cytotoxicity} = \frac{A_c - A_{Tc}}{A_c} \times 100$$

Where  $A_{Tc}$ = Absorbance of treated cells and  $A_c$ = Absorbance of control. Erlotinib was used as positive control in the assay.

#### **4.2.3. EGFR inhibitory assay**

Baculoviral expression vectors including pBlueBacHis2B and pFASTBacHTc were used separately to clone 1.6 kb cDNA coding for EGFR cytoplasmic domain (EGFR-CD, amino acids 645–1186). 5' upstream to the EGFR sequence comprised a sequence that encoded (His)<sub>6</sub>. Sf-9 cells were infected for 72h for protein expression. The pellets of Sf-9 cells were solubilized in a buffer containing sodium vanadate (100 µM), aprotinin (10 µg/mL), triton (1%), HEPES buffer(50mM), ammonium molybdate (10 µM), benzamidine HCl (16 µg/mL), NaCl (10 mM), leupeptin (10 µg/mL) and pepstatin (10 µg/mL) at 0°C for 20 min at pH 7.4, followed by centrifugation for 20 min. To eliminate the nonspecifically bound material, a Ni-NTA super flow packed column was

used to pass through and wash the crude extract supernatant first with 10mM and then with 100 mM imidazole. Histidine-linked proteins were first eluted with 250 and then with 500 mM imidazole subsequent to dialysis against NaCl (50 mM), HEPES (20 mM), glycerol (10%) and 1 µg/mL each of aprotinin, leupeptin and pepstatin for 120 min. The purification was performed either at 4 °C or on ice. To record autophosphorylation level, EGFR kinase assay was carried out on the basis of DELFIA/Time-Resolved Fluorometry. The compounds were first dissolved in DMSO absolute, subsequent to dilution to appropriate concentration using HEPES (25 mM) at pH 7.4. Each compound (10 µL) was incubated with recombinant enzyme (10 µL, 5 ng for EGFR, 1:80 dilution in 100 mM HEPES) for 10 min at 25°C, subsequent to the addition of 5X buffer (10 µL, containing 2 mM MnCl<sub>2</sub>, 100 µM Na<sub>3</sub>VO<sub>4</sub>, 20 mM HEPES and 1 mM DTT) and ATP-MgCl<sub>2</sub> (20 µL, containing 0.1 mM ATP and 50 mM MgCl<sub>2</sub>) and incubation for 1h. The negative and positive controls were included in each plate by the incubation of enzyme either with or without ATP-MgCl<sub>2</sub>. The liquid was removed after incubation and the plates were washed thrice using a wash buffer. The Europium-tagged antiphosphotyrosine antibody (75 µL, 400 ng) was added to each well followed by incubation of 1h and then washing of the plates using buffer. The enhancement solution was added to each well and the signal was recorded at excitation and emission wavelengths of 340 at 615 nm. The autophosphorylation percentage inhibition by compounds was calculated using the following equation:

$$100\% - [(negative\ control)/(positive\ control) - (negative\ control)]$$

Using the curves of percentage inhibition of eight concentrations of each compound, IC<sub>50</sub> was calculated. The majority of signals detected by antiphosphotyrosine antibody were from EGFR because the enzyme preparation contained low impurities.

#### 4.2.4. VEGFR-2 inhibitory assay

Prepare all the solutions using autoclaved, deionized water and analytical grade reagents. Prepare and store all the reagents at room temperature (unless indicated otherwise). EDTA solution (0.5 M, pH 8.0): add 95 mL ultra-pure water to 14.612 g EDTA, adjust the pH to 8.0 using NaOH solution, add 5 mL ultra-pure water; 1×Kinase Assay Buffer: add 25 mL HEPES solution (1 M), 190.175 mg EGTA, 5 mL MgCl<sub>2</sub> solution (1 M), 1 mL DTT, 50 µL tween-20, 450 mL ultrapure water, adjust pH to 7.5 and constant volume to 500 mL using ultrapure water; 4×Stop solution (40 mM): Mix 0.8 mL of the foregoing EDTA solution, 1 mL 10×Detection Buffer and 8.2 mL ultrapure water; 1×Detection Buffer: Mix 1 mL 10×Detection Buffer with 9 mL water; 4×VEGFR Kinase solution (1.74 nM, 521 times diluted, stored on ice): 1.2 µL VEGFR mother liquor (0.909 µM) was added to 624 µL 1×Kinase Assay Buffer and mixed; 4×ULight™-labeled JAK1 (substrate) (200 nM, 25 times diluted): 24 µL ULight™-labeled JAK1 (mother liquor concentration 5 µM) was added to 576 µL 1×Kinase Assay Buffer and mixed; 4×ATP Solution (40 µM, 250 times diluted): add 3 µL ATP solution (10 mM) to 747 µL 1×Kinase Assay Buffer and mixed; 4×Detection Mix (8 nM, 390.6 times diluted): 3 µL Europium- antiphospho-tyrosine antibody (PT66) (3.125 µM) was added to 1169 µL 1×Detection Buffer and mixed; 2×substrate/ATP Mix: 560 µL foregoing 4×ULight™-labeled JAK1 and 560 µL 4×ATP solution and mixed (prepared before use). The assays used an ULight-labeled peptide substrate and a Europium-W1024-labeled antiphosphotyrosine antibody. The VEGFR-2 was purchased from Carina Biosciences, Inc. (New York, USA). The 384-well plates were obtained from PerkinElmer. Compounds were dissolved in DMSO and diluted to 11 concentrations at a tripling rate from 2.500 µM to 0.042 nM and added 2.5 µL to 384-well plates. 5 µL 2×VEGFR-2 kinase solution (0.5 nM) was added to 384-well plates homogeneous

mixing and pre-reaction at room temperature for 30 min. Next, 2.5  $\mu$ L 4 $\times$ Ultra ULight<sup>TM</sup>-JAK-1(Tyr1023) Peptide (200 nM)/ATP (40  $\mu$ M) was added to the corresponding wells of a 384-well plate. Negative control: 2.5  $\mu$ L/well 4 $\times$ substrate/ATP mixture and 7.5  $\mu$ L 1 $\times$ kinase assay buffer in 384-well plate well. Positive control: 2.5  $\mu$ L/well 4 $\times$ substrate/ATP mixture, 2.5  $\mu$ L/well 1 $\times$ kinase assay buffer with 16% DMSO, 5  $\mu$ L/well 2 $\times$ VEGFR-2 kinase solution was added to the 384-well plate, The final concentration of DMSO in the mixing system was 4%. After incubation at room temperature and dark for 60 min, 5  $\mu$ L 4 $\times$ stop solution was added to corresponding wells to react for 5 min and then 5  $\mu$ L 4 $\times$ detection mix was added to the corresponding wells of a 384-well plate. The mixture was centrifugally mixed and stayed for 60 min at room temperature for color development. The plate was read using an Envision plate reader. The inhibition rate (%) = (positive well reading-compound well reading)/(positive well reading-negative well reading) $\times$ 100. The corresponding IC<sub>50</sub> values were calculated using GraphPad Prism 5.0.

#### **4.2.5. Bax activation assay**

Bring all reagents, except the human Bax- $\alpha$  Standard, to room temperature for at least 30 minutes prior to opening. The human Bax- $\alpha$  Standard solution should not be left at room temperature for more than 10 minutes. All standards, controls and samples should be run in duplicate. Refer to the Assay Layout Sheet to determine the number of wells to be used and put any remaining wells with the desiccant back into the pouch and seal the ziploc. Store unused wells at 4  $^{\circ}$ C. Pipet 100  $\mu$ L of Assay Buffer into the S0 (0 pg/mL standard) wells. Pipet 100  $\mu$ L of Standards #1 through #6 into the appropriate wells. Pipet 100  $\mu$ L of the Samples into the appropriate wells. Tap the plate gently to mix the contents. Seal the plate and incubate at room temperature on a plate shaker for 1 hour at  $\sim$ 500 rpm. Empty the contents of the wells and wash by adding 400  $\mu$ L of

wash solution to every well. Repeat the wash 4 more times for a total of **5 washes**. After the final wash, empty or aspirate the wells and firmly tap the plate on a lint free paper towel to remove any remaining wash buffer. Pipet 100  $\mu$ L of yellow Antibody into each well, except the Blank. Seal the plate and incubate at room temperature on a plate shaker for 1 hour at  $\sim$ 500 rpm. Empty the contents of the wells and wash by adding 400  $\mu$ L of wash solution to every well. Repeat the wash 4 more times for a total of **5 washes**. After the final wash, empty or aspirate the wells and firmly tap the plate on a lint free paper towel to remove any remaining wash buffer. Add 100  $\mu$ L of blue Conjugate to each well, except the Blank. Seal the plate and incubate at room temperature on a plate shaker for 30 minutes at  $\sim$ 500 rpm. Empty the contents of the wells and wash by adding 400  $\mu$ L of wash solution to every well. Repeat the wash 4 more times for a total of **5 washes**. After the final wash, empty or aspirate the wells and firmly tap the plate on a lint free paper towel to remove any remaining wash buffer. Pipet 100  $\mu$ L of Substrate Solution into each well. Incubate for 30 minutes at room temperature on a plate shaker at  $\sim$ 500 rpm. Pipet 100  $\mu$ L Stop Solution to each well. Blank the plate reader against the Blank wells, read the optical density at 450 nm. Calculate the average net Optical Density (OD) bound for each standard and sample by subtracting the average Blank OD from the average OD for each standard and sample. Using linear graph paper, plot the Average Net OD for each standard versus Bax concentration in each standard. Approximate a straight line through the points. The concentration of Bax in the unknowns can be determined by interpolation.

#### **4.2.6. Bcl-2 inhibition assay**

Mix all the reagents thoroughly without foaming before use. Wash the microwells twice with approximately 300  $\mu$ L Wash Buffer per well with thorough aspiration of microwell contents between washes. Take caution not to scratch the surface of the microwells.

After the last wash, empty the wells and tap microwell strips on absorbent pad or paper towel to remove excess Wash Buffer. Use the microwell strips immediately after washing or place upside down on a wet absorbent paper for not longer than 15 minutes. Do not allow wells to dry. Add 100  $\mu$ L of Sample Diluent in duplicate to all standard wells and to the blank wells. Prepare standard (1:2 dilution) in duplicate ranging from 32 ng/mL to 0.5 ng/mL. Add 100  $\mu$ L of Sample Diluent, in duplicate, to the blank wells. Add 80  $\mu$ L of Sample Diluent, in duplicate, to the sample wells. Add 20  $\mu$ L of each Sample, in duplicate, to the designated wells. Add 50  $\mu$ L of diluted biotin-conjugate to all wells, including the blank wells. Cover with a plate cover and incubate at room temperature, on a microplate shaker at 100 rpm if available, for 2 hours. Remove plate cover and empty the wells. Wash microwell strips 3 times as described in step 2. Add 100  $\mu$ L of diluted Streptavidin-HRP to all wells, including the blank wells. Cover with a plate cover and incubate at room temperature, on a microplate shaker at 100 rpm if available, for 1 hour. Remove the plate cover and empty the wells. Wash microwell strips 3 times as described in step 2. Proceed to the next step. Pipette 100  $\mu$ L of mixed TMB Substrate Solution to all wells, including the blanks. Incubate the microwell strips at room temperature (18° to 25°C) for about 15 minutes, if available on a rotator set at 100 rpm. Avoid direct exposure to intense light. The point, at which the substrate reaction is stopped, is often determined by the ELISA reader. Many ELISA readers record absorbance only up to 2.0 O.D. Therefore, the color development within individual microwells must be watched by the person running the assay and the substrate reaction stopped before positive wells are no longer properly detectable. Stop the enzyme reaction by quickly pipetting 100  $\mu$ L of Stop Solution into each well, including the blank wells. It is important that the Stop Solution is spread quickly and uniformly throughout the microwells to completely inactivate the enzyme. Results must

be read immediately after the Stop Solution is added or within one hour if the microwell strips are stored at 2 - 8°C in the dark. Read the absorbance of each microwell on a spectrophotometer using 450 nm as the primary wavelength.

#### **4.2.5. Caspase-3 activation assay**

Allow all reagents to reach room temperature before use. Gently mix all liquid reagents prior to use. Determine the number of 8-well strips needed for the assay. Insert these in the frame(s) for current use. Add 100 µl of the *Standard Diluent Buffer* to the zero standard wells. Well(s) reserved for chromogen blank should be left empty. Add 100 µl of standards and controls or diluted samples to the appropriate microtiter wells. The sample dilution chosen should be optimized for each experimental system. Tap gently on side of plate to mix. Cover wells with *plate cover* and incubate for 2 hours at room temperature. Thoroughly aspirate or decant solution from wells and discard the liquid, Wash wells 4 times. Pipette 100 µl of *Caspase-3 (Active) Detection Antibody* solution into each well except the chromogen blank(s). Tap gently on the side of the plate to mix. Cover plate with *plate cover* and incubate for 1 hour at room temperature. Thoroughly aspirate or decant solution from wells and discard the liquid, Wash wells 4 times. Add 100 µl Anti-Rabbit IgG HRP Working Solution to each well except the chromogen blank(s). Prepare the working dilution as described in Preparing IgG HRP. Cover wells with the *plate cover* and incubate for 30 minutes at room temperature. Thoroughly aspirate or decant solution from wells and discard the liquid. Wash wells 4 times. Add 100 µl of *Stabilized Chromogen* to each well. The liquid in the wells will

begin to turn blue. Incubate for 30 minutes at room temperature and in the dark. The incubation time for chromogen substrate is often determined by the microtiter plate reader used. Many plate readers have the capacity to record a maximum optical density (O.D.) of 2.0. The O.D. values should be monitored, and the substrate reaction stopped before the O.D. of the positive wells exceeds the limits of the instrument. The O.D. values at 450 nm can only be read after the *Stop Solution* has been added to each well. If using a reader that records only to 2.0 O.D., stopping the assay after 20 to 25 minutes is suggested. Add 100 µl of *Stop Solution* to each well. Tap side of plate gently to mix. The solution in the wells should change from blue to yellow. Read the absorbance of each well at 450 nm having blanked the plate reader against a chromogen blank composed of 100 µl each of *Stabilized Chromogen* and *Stop Solution*. Read the plate within 2 hours after adding the *Stop Solution*. Use a curve fitting software to generate the standard curve. A four-parameter algorithm provides the best standard curve fit. Read the concentrations for unknown samples and controls from the standard curve. Multiply value(s) obtained for sample(s) by the appropriate dilution factor to correct for the dilution in step 3. Samples producing signals greater than that of the highest standard should be diluted in *Standard Diluent Buffer* and reanalyzed.

#### **4.2.6. Caspase-8/9 activation assay**

Cells were obtained from American Type Culture Collection, cells were grown in RPMI 1640 containing 10% fetal bovine serum at 37°C, stimulated with the compounds to be tested for caspase 8/9, and lysed with Cell Extraction Buffer. This lysate was diluted in Standard Diluent Buffer over the range of the assay and measured for human active caspase-8/9 content. (*Cells are Plated in a density of  $1.2 - 1.8 \times 10,000$  cells/well in a volume of 100µl complete growth medium + 100 ul of the tested compound per well in a 96-well plate for 24 hours before the enzyme assay*). The absorbance of each

microwell was read on a spectro-photometer at 450 nm. A standard curve is prepared from 7 human Caspase-8/9 standard dilutions and human Caspase-8/9 concentration determined.

#### 4.2.7. TNF- $\alpha$ and IL6 a determination

The effect of compounds **8g** and **8h** on the expression of TNF-  $\alpha$  and IL-6 were determined using of q RT-PCR technique. By using q RTPCR (reference), the amount of immunomodulatory proteins TNF- $\alpha$  and IL-6 in control and compounds **8g**- and **8h**-treated HCT-116 cells was measured (at the IC<sub>50</sub> concentrations). Total RNA was extracted from 10k-treated HepG2 cells and vehicle treated control (0.01% DMSO) in accordance with the manufacturer's instructions (RNeasy mini kit, Qiagen, Germany). Following RNA extraction, the Revert Aid First Strand cDNA Synthesis kit (Thermo Scientific, USA) was used to create cDNA. The Rotor-Gene Q real-time PCR thermal cycler was used to amplify target cDNA for apoptosis markers and GAPDH [as a normalization (housekeeping) gene] using one step RT-PCR SYBR® Green kit Master Mix (Bio-Rad Laboratories, USA). Two microliters of cDNA were combined with one microliter of forward primer, one microliter of reverse primer, ten microliters of master mixture, and twenty microliters of nuclease-free water to complete the reaction volume. Every experiment was carried out three times.

Quantitative Real Time Reverse-Transcriptase PCR (qRT-PCR) primer sequences

TNF- $\alpha$  : R 5'- ATGGGCTACAGGCTTGTCACCTC -3'.

TNF- $\alpha$ : F 5'- CTCTTCTGCCTGCTGCACTTTG -3',

IL6 : R 5'- TTCTGCCAGTGCCTCTTTGCTG -3

IL6 : F 5'- AGACAGCCACTCACCTCTTCAG -3',

GAPDH : R 5'- ACCACCCTGTTGCTGTAGCCAA-3'

GAPDH : F 5'- GTCTCCTCTGACTTCAACAGCG-3'

### **4.3. Docking Studies**

Molecular docking simulations were performed to investigate the interactions between the synthesized quinazoline/1,3,4-oxadiazole derivatives and key cancer-related proteins, including EGFR and HER2, using Discovery Studio software. The protein structures were prepared and optimized for docking analysis, retaining only the essential chains for accurate binding studies.

### **4.4. Molecular dynamic simulations**

A molecular dynamics (MD) simulation was conducted using GROMACS 2023 to validate the docking results and assess the stability of the interactions between the synthesized quinazoline/1,3,4-oxadiazole derivatives and the target HER2. The protein structures were prepared using UCSF Chimera, which included the addition of hydrogen atoms to ensure accurate geometry. The CHARMM36 force field was applied to proteins, while the CGenFF force field was used for ligands. The protein-ligand complexes were immersed in a TIP3P water box with a 1 nm buffer zone to ensure proper hydration. Sodium chloride ions were added to neutralize the system, adjusting the concentration to 150 mM. Energy minimization was performed using the steepest descent method, followed by a two-phase equilibration process: a 100 ps NVT (constant number of particles, volume, and temperature) phase and a 100 ps NPT (constant

number of particles, pressure, and temperature) phase at 300 K and 1.0 bar, with position restraints applied to the protein-ligand complex. A 100-ns production run was then conducted without restraints, during which trajectories were recorded every 10 ps for subsequent analysis. Key parameters, including root mean square deviation (RMSD) and binding energy, were calculated to evaluate the stability and dynamics of the protein-ligand interactions.

#### **4.5. Density functional theory (DFT) calculations**

Density Functional Theory (DFT) calculations were conducted using the Becke three-parameter hybrid functional combined with the Lee-Yang-Parr correlation functional (B3LYP) and the 6-311+G(2d,p) basis set. In this phase of the study, geometry optimizations, frequency analyses, and molecular electrostatic potential (MEP) map calculations were performed. A frequency analysis was also conducted for the optimized structure to ensure that the geometry corresponded to true energy minima. All computational work in this section was performed using Gaussian 09 Rev.D01, and the results were visualized using Gauss View 5.

#### **4.6. Statistical analysis**

Computerized Prism 5 program was used to statistically analyzed data using one-way ANOVA test followed by Tukey's as post ANOVA for multiple comparison at  $P \leq .05$ . Data were presented as mean  $\pm$  SEM.
